# The association between socioeconomic status and mobility reductions in the early stage of England's COVID-19 epidemic

Won Do Lee<sup>a,1</sup>

Matthias Qian<sup>b</sup>

Tim Schwanen<sup>a</sup>

<sup>a</sup> Transport Studies Unit  
School of Geography and the Environment  
University of Oxford, UK

<sup>b</sup> Saïd Business School  
University of Oxford, UK

<sup>1</sup> Corresponding author  
E-mail: [wondo.lee@ouce.ox.ac.uk](mailto:wondo.lee@ouce.ox.ac.uk)

1        **The association between socioeconomic status**  
2                    **and mobility reductions in the early stage of**  
3                    **England’s COVID-19 epidemic**

4  
5  
6        **Abstract**

7        This study uses mobile phone data to examine how socioeconomic status was associated with the  
8        extent of mobility reduction during the spring 2020 lockdown in England in a manner that considers  
9        both potentially confounding effects and spatial dependency and heterogeneity. It shows that  
10       socioeconomic status as approximated through income and occupation was strongly correlated with  
11       the extent of mobility reduction. It also demonstrates that the specific nature of the association of  
12       socioeconomic status with mobility reduction varied markedly across England. Finally, the analysis  
13       suggests that the ability to restrict everyday mobility in response to a national lockdown is  
14       distributed in a spatially uneven manner, and may need to be considered a luxury or, failing that, a  
15       tactic of survival for specific social groups.

16       **Key words: COVID-19; Everyday mobility; Lockdown; Socioeconomic status; Spatial complexity.**

## 1. Introduction

Across the planet, government-mandated lockdowns, including restrictions on everyday mobility, are one of the most common policy measures to prevent and reduce the rapid spread of COVID-19 and avoid healthcare services being overwhelmed. While the specific nature of lockdowns varies across and within countries, evidence suggests that they have slowed down the spread of infections (Flaxman et al., 2020; Jarvis et al., 2020; Kraemer et al., 2020; Scally et al., 2020). Lockdowns are, however, drastic interventions with significant economic implications and disproportionately disadvantaging socially and economically vulnerable population groups (Bradbury-Jones and Isham, 2020; Proto and Quintana-Domeque, 2020; Usher et al., 2020). This is why governments in European countries facing a 'second wave' of infections hesitate to re-instate nationwide lockdowns.

Not everybody is able or willing to restrict their everyday mobility when lockdowns are in place. Studies using large mobile phone datasets (Oliver et al., 2020; Pepe et al., 2020) have demonstrated significant differences in response to restrictions on everyday mobility. Comparing 65.5m mobile phone GPS traces on 15-17 April with a pre-COVID-19 baseline in the USA, Dasgupta et al. (2020) have found more people staying at home in counties ( $n=2,633$ ) with more healthcare resources, greater wealth and less social deprivation. Bushman et al. (2020) utilised a different dataset with Call Detail Records (CDRs) for  $\pm 18$ m mobile phones across the USA and established that the increase in time spent at home after stay-at-home orders was significantly smaller in Census Block Groups (CBGs) dominated by Blacks, Hispanics and Natives/Other than in those dominated by White and Asians. However, the smaller effect size for the former groups disappeared after income was controlled. The increase was also smaller for CBGs with more individuals aged over 50 than in areas with more younger people, an effect that was independent of income. Finally, a study using spatially more aggregated mobile phone data for 13 regions in France has shown a positive correlation between the prevalence of high standards of living and the percent reduction in mobility after lockdown. It also demonstrates greater mobility reductions in regions with more people aged 24-59, more highly impacted workers and greater numbers of hospitalised people per 100,000 residents (Pullano et al., 2020).

These studies imply that the extent of mobility reduction in an area under lockdown increases as its socioeconomic status (SES) is higher. If true, then this finding can have significant implications for the implementation of future lockdowns and help explain spatial and socioeconomic inequalities in infection, hospitalisation and mortality. For example, the stringency of lockdown rules could be adapted on a local level, taking into account the socioeconomic differences across clinical commissioning groups. The objective of this paper is to provide rigorous proof for the relationship between mobility reduction and SES. Since mobile phone data can be used to monitor people's response to COVID-19 related restrictions on people's everyday mobility effectively and on an unprecedented scale (Poom et al., 2020), we use GDPR-compliant CDRs to analyse the relationships between SES and mobility reduction across England while 1) controlling for critical confounding factors and 2) considering spatial complexities in the examined relationships.

England moved to a full government-mandated lockdown later than most other North West European countries. It was only from 23 March 2020 that the Government ordered a reduction of people's everyday mobility to trips for essential purchases, medical needs and care-giving to others

1 as well as to essential work travel and one stint of exercise per day (Iacobucci, 2020). Gatherings of  
2 more than two people who did not live together were prohibited, and all but essential retail  
3 premises such as supermarkets were closed. The original restrictions were gradually lifted after 11  
4 May 2020 and have increasingly been replaced by a system of locally specific restrictions (HM  
5 Government, 2020).

6 The literature has identified a wide array of factors that are important to mobility patterns. Levels of  
7 mobility as represented by distance covered or travel time are conditioned strongly by accessibility  
8 levels, which are a combination of the resources (e.g. cars) people have for travel and the  
9 configuration of transportation and land-use systems (Fransen et al., 2018; Hanson and Schwab,  
10 1987; Neutens et al., 2010). That configuration can be approximated using the spatial distribution  
11 and intensity of people, residences, employment, retail, healthcare facilities, etcetera (Ewing and  
12 Cervero, 2010; Newman and Kenworthy, 1996). Everyday mobility is also shaped by commitments  
13 on people's time use demanding they are at certain places in physical space at particular times are  
14 also shaping everyday mobility (Cullen and Godson, 1975; Schwanen et al., 2008; Van Acker et al.,  
15 2010). The health of people in a given area should also be controlled when the relationship between  
16 SES and reduction in mobility is analysed. This is because COVID-19 tends to pose greater risks to  
17 people with underlying health conditions (Fletcher et al., 2020; Jordan et al., 2020), and such  
18 conditions are likely to be correlated with both SES and mobility levels (O' Lenick et al., 2017; Yoo et  
19 al., 2018). It is also vital to consider SES as a multi-dimensional construct in the analysis of spatial  
20 variation in everyday mobility (Hanson and Hanson, 1981; van de Coevering and Schwanen, 2006; Xu  
21 et al., 2018). This is why the analysis considers not only household income but also education and  
22 skills, occupation level, housing tenure and crime levels in residential areas. In short, this paper  
23 analyses the relationships between multiple indicators of SES and the reduction in everyday mobility  
24 during the spring 2020 lockdown in England, while controlling for the effects of accessibility, activity  
25 commitments and population health.

26 Relevant spatial complexities include spatial dependencies and spatial heterogeneity (Anselin, 1988).  
27 The former follows from Tobler's (1970) claim that geographical phenomena that are near to each  
28 other are often related to each other, and which still resonates in the current era of unprecedented  
29 global interconnections (Miller, 2004). Spatial dependencies manifest as spatial autocorrelations in  
30 linear models, potentially resulting in inaccurate conclusions about the associations between  
31 dependent and independent variables. This risk is particularly salient when spatial dependencies  
32 occur in the dependent variable (as correlations in the levels of mobility reduction in adjacent or  
33 near areas in our case) or the residuals (as correlations in the values of unobserved variables in  
34 adjacent or near areas). Spatial heterogeneity refers in the current context to geographical scale: the  
35 relationships between SES and mobility reduction may not be the same across all parts of the study  
36 area (England) but exhibit regional variations (Bonaccorsi et al., 2020; Scala et al., 2020). This  
37 suggests that the national level is not necessarily the appropriate scale at which to evaluate the  
38 relationship. Both spatial dependencies and spatial heterogeneity will be considered below as  
39 various studies have suggested they shape the relationships of demographic, environmental and  
40 healthcare factors with COVID-19 infection, hospitalisation and mortality across regions (Harris,  
41 2020; Mollalo et al., 2020; Perone, 2021; Xiong et al., 2020).

## 1 **2. Data and methods**

2

### 3 *2.1 Data and variables*

4 The analysis used anonymised and aggregated GDPR-compliant CDRs for 1,119,449 users in the  
5 period 1 March-18 April 2020<sup>1</sup>. CKDelta, a company that collected, cleaned, and anonymized the  
6 mobile phone location data from a large British mobile phone provider, granted us access to the  
7 dataset. An entry is created within the CDRs based on the on-the-fly processing of signalling  
8 messages exchanged between mobile phones and the mobile network, usually collected by mobile  
9 network operators to monitor and optimise the mobile network activities. CDRs encompass  
10 messages containing information about the identifiers of the user and of the cell phone tower  
11 handling the communication and the time stamp.

12 The temporal resolution of the CDRs, reflected in the timestamps of the user's activity, is at a second  
13 level. The median user has 42 daily CDR records with corresponding location observations before  
14 the lockdown and 24 records afterward. The spatial resolution is on a cell phone tower level. Within  
15 urban areas, the average distance from one cell phone tower to its closest neighbour is around 300  
16 meters. In rural areas, the cell phone tower density is much lower, and cell towers are one to two  
17 kilometres apart, with the largest distance to the nearest neighbouring tower at 12 kilometres.

18 We use CDRs to compute the daily median radius of gyration for users in each Clinical  
19 Commissioning Group (CCG) area ( $n=191$ ), which is a generic metric of the spatial extent of everyday  
20 mobility practices for a user. We compute the median instead of the sample mean of the radius of  
21 gyration for individual users to avoid the upward bias from the right tail of the distribution who  
22 represent those users travelling long distances on a given day. Thus, our median measure is  
23 unaffected by shifts in the long-range displacements of users. In general, the radius of gyration is a  
24 function of the number of places a user visits on a day and the distance between those places. In  
25 most cases, the radius of gyration increases if the user visits more places or if the distance between  
26 the visited places is larger. The radius of gyration is unaffected by the amount of time users spend  
27 away from their residence. Mobility will be underreported if individuals do not take their phone  
28 along or when there are no CDR records generated during a trip.

29 Alternative measures of both the range and amount of mobility exist. Pullano et al. (2020) consider  
30 long trips, which are identified with cell phone towers being more than 100 km apart. Qian et al.  
31 (2020) consider the flow of users between clinical commissioning groups and the share of users  
32 staying at home.<sup>2</sup> Hoteit et al. (2014) also discuss the total trajectory length of the users as a direct  
33 measure of the amount of mobility. However, they note that the range and amount of mobility are  
34 highly corrected. While other measures of mobility have equal merit, we use the radius of gyration

---

<sup>1</sup> Two percent of the population has been sub-sampled from the users of a large British mobile phone provider, stratified by the 191 Clinical Commissioning Groups (the reconfiguration of CCGs have taken place in April 2020, a number of CCGs have reduced from 191 to 136 in April 2020) in England.

<sup>2</sup> Using data from Qian et al. 2020, we find a 96% Pearson correlation between the proportion of users staying at home and the median radius of gyration for users across the United Kingdom, providing further evidence of the equivalence of measures of the range and amount of mobility.

1 as it is widely employed in studies using mobile phone data (González et al., 2008; Pappalardo et al.,  
2 2019, 2015).

3 Researchers have provided various interpretations for our gyration measure. González et al. (2008)  
4 interpreted the measure as the characteristic distance travelled by a user. De Montjoye et al. (2013)  
5 explained it as the smallest circle that contains all the places a user has been to on a given day. Xu et  
6 al. (2018) suggested that it measures the spatial extent of a phone user's activity space from the  
7 user's trajectories in a given time. To this end, this research measures the extensivity of activity  
8 space (Lu et al., 2020) though summation of the distance from all points of user  $i$  travels among the  
9 time-stamped ( $t$ ) locations  $l_{i,d,t}$  on day  $d$  from the trajectory's centre of mass  $c$  can be formulated as  
10  $l_{i,d}^c = 1/n \sum_{t=1} l_{i,d,t}$  on that day. Locations  $l$  are approximated by the nearest mobile phone tower.  
11 Formally, the radius of gyration  $r_{i,d}$  can be expressed as:

$$r_{i,d} = \sqrt{\frac{1}{n} \sum_{t=1} (l_{i,d,t} - l_{i,d}^c)^2} \quad (1).$$

12 We aggregate user-level  $r_{i,d}$  values to the spatial level CCG areas in which individuals reside,<sup>3</sup> to  
13 protect the individual privacy and because CCGs decide what healthcare services are needed to  
14 meet the specific needs of the population in their area, and make sure those services are provided.  
15 While NHS (National Health Service) England hold primary responsibility for the commissioning of  
16 primary care services such as general practitioner (GP) and dental care services, CCGs commission  
17 most hospital care, including urgent and emergency care. They thus play a critical role in the  
18 healthcare response to COVID-19; their services will be overwhelmed first if compliance with a  
19 government-mandated lockdown is (very) low. We use the median  $r_{i,d}$  across users in a given CCG  
20 area in the analysis below, because the median is less sensitive to right-skewed distributions and  
21 outliers than the sample mean. Because the study concentrates on mobility reductions, it does not  
22 analyse the median radius of gyration of residents across CCG areas  $j$  on a given day,  $G_{j,d}$ . It rather  
23 analyses the reduction in mobility  $R_{j,d}$  relative to a reference day,  $REF$ :

$$R_{j,d} = \left[ \frac{G_{j,d} - G_{j,REF}}{G_{j,REF}} \right] \times 100 \quad (2).$$

24 Tuesday 3 March is chosen as  $REF$ , because it was the last 'normal' Tuesday before mobility levels in  
25 England started to drop in connection with COVID-19. Prior to the epidemic Tuesday was the day of  
26 the week on which mobility levels tended to be very high because the share of people commuting to  
27 employment or education was larger than on most other days (Department for Transport, 2020a). As  
28 explained in Section 3.1, we study population movement on four consecutive Tuesdays starting on  
29 the 24 March, which is the day after the national lockdown commenced, until the 14 April.

30 The information on mobility reductions across England is correlated with data on SES, accessibility,

---

<sup>3</sup> The computation of home region of users exploits the night-time location when users are most likely to be at home. Home region detection followed three steps: a) filter observations from 10 pm to 6 am, b) finding the most common cell phone tower used at night-time, c) dropping users with fewer than 30 night-time observations per month. Each cell phone tower is assigned to its Clinical Commissioning Group area according to its location.

1 activity commitments and population health from the 2011 Census and other sources provided by  
2 the Office for National Statistics (ONS). While a Lower Layer Super Output Area (LSOA) level is the  
3 spatial resolution of non-mobility datasets, we aggregate data to the CCG area level by using an  
4 official lookup table retrieved from ONS geography portal. The creation of variables from the  
5 available data has been based on the authors' knowledge of relevant literature on the spatial  
6 variation in everyday mobility (see Introduction). In total, we use 28 operational variables in the  
7 regression analyses described below (Table 1). Originally, a series of indicators of the racial/ethnic  
8 composition of the CCG areas were included but these had to be dropped because of  
9 multicollinearity with the percentage of people who do not speak English and resident population  
10 density. Spatially disaggregated data on COVID-19 incidence rates were also excluded from the  
11 analysis because of low reliability in March and April 2020 when diagnostic testing for the disease  
12 was very limited in England.

13 **[Insert Table 1 here]**

14

## 15 *2.2 Modelling*

16 A series of econometric models of increasing spatial complexity has been specified to understand  
17 the relationships of SES, accessibility, activity commitments and population health with mobility  
18 reduction  $R_{j,d}$ . The first model is a Stepwise Linear Regression Model (SLRM) in which the values for  
19 the dependent variable and regressors are treated as independent from each other is given by  
20  $R_{j,d} = \beta_0 + x_j\beta_j + \varepsilon_j$ , where  $\beta_0$  is the intercept,  $x$  a vector of regressors,  $\beta$  a vector of regression  
21 coefficients, and  $\varepsilon$  the error term. We used a combination of forward and backward elimination of  
22 potential explanatory variables to achieve a specification that combines model parsimony with  
23 goodness-of-fit and plausibility of interpretation. All variables have been standardised with a mean  
24 of zero and variance of unity to facilitate interpretation (Oshan et al., 2020). The contribution of  
25 each regressor in the SLRM to the statistical explanation of mobility reduction is demonstrated with  
26 the help of Lindeman et al.'s (1980) relative importance metric (*LMG*), which identifies the average  
27 incremental improvement of each predictor based upon the decomposition of  $R^2$ .

28 Next, we consider two distinct spatial regression models that account for spatial autocorrelation at  
29 the global level of all 191 CCG areas in England, as defined by spatial weights  $W$  (Anselin and Arribas-  
30 Bel, 2013). The Spatial Lag Model (SLM) captures the substantial spatial dependency in mobility  
31 reduction in a given CCG area and the neighbouring CCGs. The SLM model specification includes a  
32 spatially lagged dependent variable:

$$R_{j,d} = \beta_0 + x_j\beta_j + \rho W_j y_j + \varepsilon_j, \quad (3),$$

33 where the spatial lag coefficient  $\rho$  indicates the impact of mobility reductions in neighbouring areas  
34 on the reduction in CCG area  $j$ . In contrast, the Spatial Error Model (SEM) addresses spatial error  
35 autocorrelation. The SEM model specification includes a spatial autoregressive error term:

$$R_{j,d} = \beta_0 + x_j\beta_j + \lambda W_j \xi_j + \varepsilon_j. \quad (4),$$

36 where  $\xi_j$  denotes the spatial component of the error term and  $\lambda$  the spatial error coefficient.



1 Finally, we use two different Geographically-Weighted (GW) models to examine the local variation in  
2 the rates of change so that the coefficients in the model are specific to a location  $(u_j, v_j)$  rather than  
3 being global estimates. Geographically Weighted Regression (GWR) estimates the  $k$ th coefficient  $\beta_k$   
4 for location  $(u_j, v_j)$  through kernel density estimation (Fotheringham et al., 2017). The GWR  
5 regression specification can be expressed as:

$$R_{j,d} = \sum_{k=0}^m \beta_k(u_j, v_j) x_{jk} + \varepsilon_j \quad (5),$$

6 Where  $m = n + 1$  (191 CCG areas+1=192). To obtain the localised parameter estimates  $\beta_k(u_j, v_j)$   
7 for each regressor  $x_{jk}$ , GWR employs the (diagonal) spatial weight matrix  $W$ , constructed from the  
8 weights to define the spatial neighbourhood that provides the best model fit. The kernel density  
9 estimation approach requires the specification of a kernel function and a bandwidth for  $W$   
10 (Brunsdon et al., 2010). This study uses the bi-square kernel function and calibrates the bandwidth  
11 on the basis of  $k=4$  nearest neighbours to generate the local weightings (Li et al., 2020; Oshan et al.,  
12 2019). It also uses a fixed average bandwidth,  $BW$ , of 150 across all regressors. The vector of local  
13 parameters  $\hat{\beta}$  for the matrix of regressors  $X$  can be expressed as:

$$\hat{\beta}(u_j, v_j) = [X'W(u_j, v_j)X]^{-1} X'W(u_j, v_j)y \quad (6).$$

14 While the GWR captures spatial heterogeneity in a manner that the global models SLRM, SLM and  
15 SEM cannot do, it assumes that the spatial scale over which local variations in the effects of  
16 regressors – and thus the spatial processes they reflect – are identical across regressors. This  
17 assumption may be unduly limiting and is relaxed in Multi-scale Geographically Weighted Regression  
18 (MGWR). MGWR allows for conditional relationships between the dependent variable and each  
19 regressor through the selection of an optimal BW for each regressor (Fotheringham et al., 2017) can  
20 be expressed as Equation (7):

$$R_{j,d} = \sum_{k=0}^m \beta_{bwk}(u_j, v_j) x_{jk} + \varepsilon_j \quad (7),$$

21 where  $bwk$  indicates the BW used for calibration of the  $k$ th conditional relationship for MGWR. This  
22 study also deploys the adaptive kernel with bi-square function for MGWR model calibration to  
23 update and remove the spatial effects of each regressor outside the neighbourhood as specified by  
24 bandwidth. All GW models in this study were estimated using the *GWmodel* package in *R* software  
25 (Gollini et al., 2015).

26

## 27 **3. Results**

28

### 29 *3.1 Spatial and temporal patterning of mobility reduction in England*

30 Across England, mobility levels as represented by the median radius of gyration declined 70.4%  
31 between 3 and 28 March (Qian et al., 2020; Santana et al., 2020). This reduction commenced almost



1 two weeks before the start of the government-mandated lockdown on 23 March, and over the  
2 course of April gradually reversed. Nonetheless, the England-wide trend in Figure 1 disguises stark  
3 local and regional variations. Figure 2 depicts hot and cold spots in mobility reduction based on the  
4  $G_i^*$  statistic, which identifies local pockets where particular values for a given variable are  
5 concentrated (Getis and Ord, 1992; Ord and Getis, 1995). Hot and cold spots are spatial clusters of  
6 contiguous CCG areas where mobility reductions are significantly (at  $p < 0.05$ ) greater or smaller than  
7 the England-level average. Figure 2 shows multiple spatial clusters, with the most considerable  
8 decrease in everyday mobility (i.e. hot spots) occurring in Greater London and the smallest (i.e. cold  
9 spots) in the Yorkshire and the Humber region and South West England. The locations of hot and  
10 cold spots bear some resemblance to the hotspots of COVID-19 incidence rates during spring 2020 in  
11 England (NHS Digital, 2020). According to the Royal Berkshire NHS Trust, London recorded the first  
12 COVID-19 related death on the 5 March. Yorkshire and the Humber and South West England  
13 recorded their first deaths only on 17 March and 15 March, respectively.

14 **[Insert Figures 1-2 here]**

15

### 16 *3.2 The association of socioeconomic status with everyday mobility reductions*

17 To some extent, and across all four dates considered, the hot and cold spots of mobility reduction  
18 map onto areas where households in respectively the top and bottom quintiles of the national  
19 income distribution are overrepresented. Greater London clearly has the most households in the top  
20 income group, and Yorkshire and the Humber has many in the lowest quintile (Figure 3). A visual  
21 comparison of Figure 2 and 3 suggests a correlation between the reduction in everyday mobility  
22 levels and SES of CCG areas. It is, however, unclear how strong and linear the association with  
23 income, as only one marker of SES, is and whether other factors confound that association.

24 **[Insert Figure 3 here]**

25 The Stepwise Linear Regression Model (SLRM) confirms a clear relationship of income with mobility  
26 reduction and demonstrates that multiple other variables help to explain spatial differences in  
27 mobility reduction during the government-mandated lockdown across England. Of the 28 variables  
28 considered, only six are significantly ( $p < 0.01$ ) correlated with the level of mobility reduction that  
29 multicollinearity does not affect ( $VIF < 6$ ). The selected variables are identical across the four  
30 consecutive Tuesdays in March and April. Half relate to SES of the resident population: share of non-  
31 English speakers, share of high-income households who belong to the top quintile of the household  
32 income distribution in England and Wales, and share in lower-middle class occupation (social grade  
33 C1). The other three selected variables concern accessibility (resident population density), activity  
34 commitments (share of population who are self-employed), and population health (share of  
35 residents with bad health status). Depending on the date considered, these six variables explain 70-  
36 74% of the variation in the spatial distribution of mobility reduction.

37 **[Insert Tables 1 here]**

38 The regression coefficients show that mobility reduction was greater in areas with more high-income  
39 households, non-English speakers, workers in lower middle-class occupations and people in bad

1 health. Mobility reduction was also greater in areas with higher average population density but  
2 smaller in those with more self-employed workers. The effect sizes are fairly stable across the four  
3 dates considered, and sensitivity tests have shown that all relationships are approximately linear in  
4 nature. According to the *LMG* values, the household income variable makes the strongest  
5 contribution to the explanation of spatial differences in mobility reduction, followed by residential  
6 density, then the share of people who do not speak English. A local area's SES was strongly  
7 associated with the extent of the mobility reduction among its residents at the start of the national  
8 lockdown.

9

### 10 *3.3 Spatial complexity I: The importance of spatial dependency*

11 While useful, SLRM models are spatially naïve because they do not account for spatial dependency  
12 or heterogeneity. The spatial clustering of mobility reduction levels across England in Figure 2 gives  
13 reason to expect unobserved factors may be creating spatial dependencies that potentially bias the  
14 regression coefficients. The SLM models, in which a spatially lagged dependent variable – i.e. the  
15 average mobility reduction in surrounding areas – is included as an additional regressor, confirms  
16 the existence of upward bias in the standard regression model. Table 2 show a significant spatial lag  
17 coefficient on all four dates, yet it also displays smaller coefficients for the six previously selected  
18 variables. The Akaike Information Criterion (AIC), which measures the extent of information loss for  
19 a given model, can be used to compare different model specifications with each other (as long as the  
20 more restricted version is nested in the other). The smallest difference  $\Delta AIC_{SRM}$  occurs for 31 March  
21 with a value (2.0) that still offers, in the words of Burnham and Anderson (2004, page 70),  
22 “substantial” evidence in favour of the SLM specification; for the other dates the evidence favouring  
23 the SLM specification is considerably stronger.

24

[Insert Table 2 here]

25 Controlling for spatial dependency in the residuals does not improve the results to the same extent.  
26 We find that there is evidence to favour the SEM specification only for 7 April. Nevertheless, the SLM  
27 models still offer a great improvement relative to the linear regression model. These results indicate  
28 that it is more important to account for spatial spill-over effects in mobility reduction than to control  
29 for spatial dependencies due to unobserved independent variables.

30

### 31 *3.4 Spatial complexity II: The relevance of spatial heterogeneity*

32 The SLM and SEM specifications remain global models that cannot fully capture variations in the  
33 associations of mobility reduction with SES, accessibility, activity commitments and public health at  
34 sub-national levels. The fact that the values for  $\Delta AIC_{GWR}$  and  $\Delta AIC_{MGWR_1}$  (Table 4) are markedly  
35 greater than for  $\Delta AIC_{SRM}$  indicates that considering spatial heterogeneity is more important than  
36 accounting for spatial dependency in analyses of the extent of mobility reduction during England's  
37 lockdown. Together the values of the adjusted  $R^2$ ,  $\Delta AIC$  and  $\Delta AIC_c$  indicates that GWR and MGWR  
38 specifications clearly outperform the OLS specification for all four days. The values for  $\Delta AIC$ , and  
39  $\Delta AIC_c$  are clearly  $>10$ , which means there is “essentially no support” (Burnham and Anderson, 2004,  
40 p. 71) for the SLRM specification.

1 **[Insert Table 3 here]**

2 The  $\Delta AIC$  and  $\Delta AIC_c$  values indicate that the MGWR specification is also superior to its GWR  
3 counterpart on 7 April. The case is less clear-cut for the other three dates although the  $\Delta AIC$  and  
4  $\Delta AIC_c$  marginally favour the MGRW models, which provide valuable information on the scale at  
5 which different processes operate. Determining that scale as part of the modelling rather than  
6 deciding it a priori is useful since Table 4 shows that for three out of six regressors – non-English  
7 speakers, social grade C1 and poor health – the estimated bandwidth equals 190 and is thus  
8 estimated at the England-wide level on all days considered. It is the share of households in the top  
9 income quintile and resident population density – the two most important regressors– for which  
10 effects are more spatially restricted. The models fit the data best in East England, mainly Norfolk and  
11 surroundings, followed by the South East; adjusted  $R^2$  values are substantially lower in North  
12 England, typically more than 20 percent points than in the Norfolk and surrounding areas (Figure 4).

13 **[Insert Figure 4 here]**

14 The mean effects for the six regressors (Table 4) are stable over the four dates considered and  
15 broadly comparable to those for the SLRM specification. The model for 7 April tends to exhibit the  
16 greatest differences from other days when attention is directed towards the mean values. In  
17 addition, variation around the estimated mean value is markedly larger for the households in the top  
18 income quintile, residential density and the intercept. This indicates that spatial variation in the  
19 strength of the association with mobility reduction is most pronounced for the two strongest  
20 correlates plus the intercept. In relative terms, the variation around the mean is largest on three out  
21 of four days for residential density, but this is due to CCG areas with unusually high coefficients in  
22 the Lincoln-Hull region, followed by the North East. The right-skewed distribution of estimated  
23 coefficients can also be observed for households in the highest income quintile. Here the highest  
24 coefficients are observed for the area around Newcastle, followed by the rest of the North. In  
25 contrast, the lowest coefficients for the income and density variables can be found in South and East  
26 England. In those areas, the share of people in the lower middle classes (social grade C1) and with  
27 bad health are, relatively speaking, much more important to the explanation of mobility reduction.  
28 Greater London and its commuter belt also have high intercept values from 31 March onwards,  
29 suggesting that the base level of mobility reduction that is independent of any variable in the model  
30 has been rather high.

31 **[Insert Table 4 here]**

32 This discussion indicates substantial local variation in the correlates of mobility reduction in March  
33 and early April (Table 5). Consider, for instance, Newcastle upon Tyne in North East England for  
34 which the model explanatory power is comparatively low and spatial differences in mobility  
35 reduction are primarily a function of the share of households in the top quintile, residential density  
36 and the share of self-employed workers. This is different from London where there is a much more  
37 consistent base level reduction (i.e. intercept coefficient), and the explanatory power is distributed  
38 much more equally across all independent variables although bad health is relatively important and  
39 density and the self-employment less so. The implication of the local differences shown in Table 6 is  
40 that, whereas SES is important everywhere, the role of individual variables varies spatially.

1 [Insert Table 5 here]

2

### 3 **4. Discussion**

4 The reduction in everyday mobility across CCG areas in England in response to COVID-19 has been  
5 large, with a 70% reduction in the median radius of gyration, but broadly comparable with  
6 observations in other studies (Apple Inc, 2020; Google LLC, 2020; Jacobsen and Jacobsen, 2020; Pepe  
7 et al., 2020). These headline figures do not consider substantial variation at the individual or  
8 household level, which is where decisions about which trips to make or to forego are made. This is  
9 why the regression models presented in this article do not offer evidence of causal effects.  
10 Interpreting them in this manner would amount to ecological fallacy (Robinson, 1950). This does not,  
11 however, invalidate those models. After all, decisions about public health interventions as well as  
12 assessments of their effects and effectiveness take place at the level of populations and territories  
13 and not at the level of individuals or households.

14 The nature of the correlations of mobility reduction across England's CCG areas with socio-economic  
15 status, accessibility, activity commitments and population health is in line with expectations. The  
16 strong influence of share of people in the top income quintile is not surprising, given that high-  
17 income workers tend to have greater discretion over when and where they work (Witteveen and  
18 Velthorst, 2020) and thus greater ability to work from home. In addition, people on high incomes  
19 tend to travel more than those on low incomes: individuals in the lowest household income quintile  
20 made 859 trips and covered 4,138 km in 2019 against 995 trips (+16%) and 9,236 km in the highest  
21 quintile (+223%) according to the UK National Travel Survey (Department for Transport, 2020b). The  
22 inclusion of the share of people in social grade C1 indicates that, once spatial differences in income  
23 are taken into account, CCG areas with more lower-middle workers experienced a lower total need  
24 to commute to/from work than territories with more working class individuals and households.  
25 Differences in ability to work from home are again relevant here, as is the observation that many key  
26 workers are employed in low-education, low-pay and precarious jobs associated with working class  
27 status in domains such as supermarkets, logistics and last-mile delivery, and construction.

28 The positive regression coefficients for the share of non-English speakers in Tables 2, 3 and 5 suggest  
29 that this variable may not be as much an indicator of SES as initially expected. As indicated above,  
30 the share of non-native English speakers is greatest in CCG areas where many people from non-  
31 Western heritage live. These individuals and households are comparatively likely to be excluded  
32 from car access and ownership (Lucas and Jones, 2009). They are thus strongly dependent on public  
33 transport, even when their concentration in higher-density locations (Badoe and Miller, 2000;  
34 Schimek, 1996) is taken into account. At the same time, it rapidly became clear over the spring of  
35 2020 that ethnic minorities in the UK were at higher risk of COVID-19 infection and hospitalisation  
36 and mortality because of the virus (Proto and Quintana-Domeque, 2020). The coefficients in Tables  
37 2, 3 and 5 may therefore also reflect a strong inclination to stay at home among groups from non-  
38 Western heritage because of perceived health risks.

39 Among the remaining variables, the positive coefficients for percent of the population in bad or very  
40 bad health and the negative coefficients for the share of population that is self-employed are as

1 expected. The former most likely reflects a greater prevalence of government-encouraged shielding  
2 by clinically (extremely) vulnerable individuals and their households during the early stages of the  
3 epidemic. Yet, it may also reflect differences in local information campaigns, with health authorities  
4 in areas with large number of people with underlying health conditions perhaps placing greater  
5 emphasis on the need to shield and/or being more effective in reaching vulnerable individuals and  
6 households. It is also possible that greater and more effective community networks were in place or  
7 emerged in places with more clinically vulnerable households. Further research would be necessary  
8 to probe these conjectures. The result for share of self-employed workers seems to reflect  
9 autonomy over working hours and locations as well as discretion to engage in work- and business-  
10 related travel. Yet, a lack of choice also seems to be involved: for their business to survive and to  
11 make a living, many self-employed individuals may have to travel to suppliers and customers,  
12 whether they like it or not. Factors such as these may push up the (median) mobility at the CCG area  
13 level once differences in SES, accessibility and population health are taken into account.

14 The strong effect of population density is somewhat surprising but the positive correlation certainly  
15 not. Public transport use increases substantially with density (Badoe and Miller, 2000; Schimek,  
16 1996) and this form of travel has been affected severely during the COVID-19 epidemic. Not only is it  
17 widely seen as a site where infection risk is particularly high, the capacity of service provision was  
18 dramatically reduced in the early stages of the epidemic and the Government's official  
19 communication actively discouraged UK residents from using buses, trams, metros and trains. In  
20 addition, it is in high-density areas that the availability of local shops and delivery of groceries and  
21 other shopping bought online was most common before the epidemic (Brand et al., 2020). The need  
22 to travel for everyday needs is thus lower and can be satisfied locally more easily. Finally, the  
23 correlation of density with share of population of non-Western heritage may suggest a stronger  
24 inclination to stay at home due to perceived health risks in CCG areas with high population densities.

25 The above interpretations suggest that demographic compositions may be more important than  
26 geographic context at CCG area level. Nonetheless, neighbourhood factors may also hint at the  
27 effects of geographic context if there have indeed been differences in how CCGs have overseen the  
28 provision of spatially differentiated information to vulnerable individuals and their households. In  
29 addition, the relative prominence of compositional factors may reflect the scale at which mobility  
30 reductions have been analysed. The CCG level is an appropriate choice in light of the healthcare  
31 sector's response to the COVID-19 epidemic in England, but that does not mean that analysis  
32 conducted at another spatial level or using another classification of zones would have rendered the  
33 same results. The findings in this study remain subject to the modifiable areal unit problem  
34 (Fotheringham and Wong, 1991), and further work at different scales and with different spatial  
35 zones would enhance the understanding of how SES and other factors have shaped mobility  
36 reductions during the England-wide lockdown in early 2020.

37 The above analysis warrants two further conclusions. First, as the spatial regression models (Table 2)  
38 have suggested, mobility reduction in a given territory – even at the relatively aggregate level of the  
39 CCG area – is not independent from what happens in that territory's neighbourhood. Figure 2 shows  
40 multiple, spatially extensive hot and cold, and the SLM specifications show that the spatially lagged  
41 dependent variables become statistically significant and meaningful regressors. Moreover, the  
42 inclusion of the latter reduces the coefficients of regressors measuring the attributes of the CCG

1 area for which mobility reduction is analysed. This should come as a surprise: many people’s  
2 everyday mobility and activity spaces are not contained within the administrative territories on the  
3 basis of which healthcare services are provided. A comparison of Tables 3 suggests that SES,  
4 accessibility, activity commitments and population health in surrounding areas have shaped the  
5 extent of mobility reduction in a given CCG area. Had a spatial classification at a finer resolution  
6 been deployed, then the influence of neighbouring areas – and the need for spatially advanced  
7 econometrics – would have been even larger than in the present study.

8 Second, the relationships of mobility reduction with SES, accessibility, activity commitments and  
9 population health at the CCG level area vary significantly across England. As Table 3 demonstrates  
10 unambiguously, a spatially naïve linear regression model is simply not appropriate if the aim is to  
11 capture the spatial heterogeneity of the correlates of mobility reduction at the CCG area level. This is  
12 because on the one hand the relative importance of the regressors discussed above differs markedly  
13 across CCG areas, and on the other hand the underlying spatial processes play out over different  
14 spatial scales. The effects of the share of households in the top income quintile and resident  
15 population density – income and density – have the most pronounced geographies. Table 6 indicates  
16 that they have the strongest discriminatory effects in the post-industrial effects in North England,  
17 given that the coefficients for these variables are largest in Manchester, Leeds and Newcastle-on-  
18 Tyne while the overall goodness-of-fit ( $R^2$ ) for those cities is at most 87% of what it is in the City of  
19 London. These results are not altogether unexpected, given that spatial differences in the prevalence  
20 of high-income households (Figure 3) and resident population density are more pronounced across  
21 North England than across most of the North East.

22

## 23 **5. Conclusion**

24 This study has used mobile phone data to provide rigorous evidence for an link between  
25 socioeconomic status (SES) with mobility reduction during the Spring 2020 lockdown in England,  
26 while considering the potentially confounding effects of other factors and “recognising the  
27 fundamental spatiality of the current COVID-19 crisis” (Poom et al., 2020, p. 5). Two main  
28 conclusions can be drawn along with a future research direction.

29 First, SES has indeed been correlated with the extent of mobility reduction in the early stage of  
30 England’s COVID-19 epidemic. The headline figure of a 70% reduction in everyday mobility obscures  
31 marked spatial differences across local areas (Figure 1). All else equal, areas with more high-income  
32 households have seen the largest reductions in mobility, while those with more workers in lower  
33 middle-class occupations have seen greater reductions compared with those with more people in  
34 working-class occupations. The finding that areas with more non-English speakers have experienced  
35 greater reductions in mobility to some extent contravenes the suggestion that higher SES is  
36 associated with greater mobility reductions, but seems to reflect differences in the risk of infection,  
37 hospitalisation and death along lines of race/ethnicity. The greater reduction in mobility in territories  
38 with more non-English speakers appears to be an aggregate-level consequence of more shielding in  
39 response to the circulation of information about exposure risks, as it is in areas with more residents  
40 who are in bad or very bad health.



1 Second, the specific nature of the association of SES with mobility reduction varies markedly across  
2 England. There are both global (England-wide) and local factors that make a spatially naïve,  
3 conventional regression analysis inadequate and inappropriate. Territories as large as CCG areas are  
4 not independent as reductions in one area are influenced by those in surrounding areas due to  
5 everyday mobility patterns' transgression of administrative boundaries. More importantly, the  
6 strength of correlations between mobility reduction on the one hand and SES, accessibility, activity  
7 commitments and population health differs markedly across the country. Additionally, the  
8 significance of SES is larger across Northern England than in London and the South East.

9 Our study leaves open the question why (economically) disenfranchised areas had a lower  
10 compliance with lockdowns. Moreover, one may conjecture that local areas in which many residents  
11 could not afford the relative luxury of staying at home and reducing their mobility as much as in  
12 more privileged areas are at a disadvantage (e.g., more infections, overwhelmed healthcare services)  
13 in later stages of the COVID-19. Verification of this conjecture is beyond the current study but the  
14 path-dependent spatial differentiation in ability to reduce everyday mobility is an important topic for  
15 future research.



## 1 **Availability of data and materials**

2 All source R code and data necessary for the replication of our results and figures is available at  
3 <https://github.com/wondolee/COVID19>.

## 5 **Credit authorship contribution statement**

6 Won Do Lee: Conceptualisation, Data Curation, Methodology, Formal analysis, Writing-Original draft  
7 preparation. Matthias Qian: Data Curation, Writing-Reviewing and Editing. Tim Schwanen:  
8 Conceptualisation, Writing-Original draft preparation, Supervision, Writing-Reviewing and Editing.

## 10 **Declaration of competing interest**

11 The authors declare that they have no known competing financial interests or personal relationships  
12 that could have appeared to influence the work reported in this paper.

## 14 **Acknowledgement**

15 The authors would like to thank CKDelta company as the project partner of “Oxford COVID-19  
16 Impact Monitor”, to provide a wide array of anonymised and aggregated data. This research did not  
17 receive any specific grant from funding agencies in the public, commercial, or not-for-profit sectors.

## 19 **References**

- 20 Anselin, L., 1988. *Spatial Econometrics: Methods and Models*, Studies in Operational Regional  
21 Science. Springer Netherlands, Dordrecht. <https://doi.org/10.1007/978-94-015-7799-1>
- 22 Anselin, L., Arribas-Bel, D., 2013. Spatial fixed effects and spatial dependence in a single cross-  
23 section. *Pap. Reg. Sci.* 92, 3–17. <https://doi.org/10.1111/j.1435-5957.2012.00480.x>
- 24 Apple Inc, 2020. *Apple COVID-19 Mobility Trends Reports* [WWW Document]. URL  
25 <https://www.apple.com/covid19/mobility> (accessed 10.14.20).
- 26 Badoe, D. a., Miller, E.J., 2000. Transportation-land-use interaction: Empirical findings in North  
27 America, and their implications for modeling. *Transp. Res. Part D Transp. Environ.* 5, 235–263.  
28 [https://doi.org/10.1016/S1361-9209\(99\)00036-X](https://doi.org/10.1016/S1361-9209(99)00036-X)
- 29 Bonaccorsi, G., Pierri, F., Cinelli, M., Flori, A., Galeazzi, A., Porcelli, F., Schmidt, A.L., Valensise, C.M.,  
30 Scala, A., Quattrocioni, W., Pammolli, F., 2020. Economic and social consequences of human  
31 mobility restrictions under COVID-19. *Proc. Natl. Acad. Sci.* 117, 15530–15535.  
32 <https://doi.org/10.1073/pnas.2007658117>
- 33 Bradbury-Jones, C., Isham, L., 2020. The pandemic paradox: The consequences of COVID-19 on  
34 domestic violence. *J. Clin. Nurs.* 29, 2047–2049. <https://doi.org/10.1111/jocn.15296>
- 35 Brand, C., Schwanen, T., Anable, J., 2020. ‘Online Omnivores’ or ‘Willing but struggling’? Identifying  
36 online grocery shopping behavior segments using attitude theory. *J. Retail. Consum. Serv.* 57,  
37 102195. <https://doi.org/10.1016/j.jretconser.2020.102195>
- 38 Brunson, C., Fotheringham, a S., Charlton, M.E., 2010. Geographically Weighted Regression: A  
39 Method for Exploring Spatial Nonstationarity. *Geogr. Anal.* 28, 281–298.  
40 <https://doi.org/10.1111/j.1538-4632.1996.tb00936.x>
- 41 Burnham, K.P., Anderson, D.R., 2004. *Model Selection and Multimodel Inference*. Springer New York,  
42 New York, NY. <https://doi.org/10.1007/b97636>

- 1 Bushman, K., Pelechris, K., Labrinidis, A., 2020. Effectiveness and Compliance to Social Distancing  
2 During COVID-19 1–15.
- 3 Cullen, I., Godson, V., 1975. Urban networks: The structure of activity patterns. *Prog. Plann.* 4, 1–96.  
4 [https://doi.org/10.1016/0305-9006\(75\)90006-9](https://doi.org/10.1016/0305-9006(75)90006-9)
- 5 Dasgupta, N., Funk, M.J., Lazard, A., White, B.E., Marshall, S.W., 2020. Quantifying the social  
6 distancing privilege gap a longitudinal study of smartphone movement. *medRxiv* 0–13.  
7 <https://doi.org/10.1101/2020.05.03.20084624>
- 8 de Montjoye, Y.-A., Quoidbach, J., Robic, F., Pentland, A., 2013. Predicting Personality Using Novel  
9 Mobile Phone-Based Metrics, in: Greenberg, A.M., Kennedy, W.G., Bos, N.D. (Eds.), *Social  
10 Computing, Behavioral-Cultural Modeling and Prediction*. Springer, Berlin, Heidelberg, pp. 48–  
11 55. [https://doi.org/10.1007/978-3-642-37210-0\\_6](https://doi.org/10.1007/978-3-642-37210-0_6)
- 12 Department for Transport, 2020a. Statistical data set: When people travel [WWW Document]. URL  
13 <https://www.gov.uk/government/statistical-data-sets/nts05-trips> (accessed 10.15.20).
- 14 Department for Transport, 2020b. Statistical data set: Travel by vehicle availability, income, ethnic  
15 group, household type, mobility status and NS-SEC [WWW Document]. URL  
16 <https://www.gov.uk/government/statistical-data-sets/nts07-car-ownership-and-access>  
17 (accessed 10.15.20).
- 18 Ewing, R., Cervero, R., 2010. Travel and the Built Environment. *J. Am. Plan. Assoc.* 76, 265–294.  
19 <https://doi.org/10.1080/01944361003766766>
- 20 Flaxman, S., Mishra, S., Gandy, A., Unwin, H.J.T., Mellan, T.A., Coupland, H., Whittaker, C., Zhu, H.,  
21 Berah, T., Eaton, J.W., Monod, M., Ghani, A.C., Donnelly, C.A., Riley, S.M., Vollmer, M.A.C.,  
22 Ferguson, N.M., Okell, L.C., Bhatt, S., 2020. Estimating the effects of non-pharmaceutical  
23 interventions on COVID-19 in Europe. *Nature*. <https://doi.org/10.1038/s41586-020-2405-7>
- 24 Fletcher, R.A., Matcham, T., Tibúrcio, M., Anisimovich, A., Jovanović, S., Albergante, L., Lipunova, N.,  
25 Hancock, A., Mackillop, L., Tarassenko, L., McCarthy, A., Vizcaychipi, M.P., Khan, R.T., 2020. Risk  
26 factors for clinical progression in patients with COVID-19: a retrospective study of electronic  
27 health record data in the United Kingdom. *medRxiv* 2020.05.11.20093096.  
28 <https://doi.org/10.1101/2020.05.11.20093096>
- 29 Fotheringham, A.S., Wong, D.W.S., 1991. The Modifiable Areal Unit Problem in Multivariate  
30 Statistical Analysis. *Environ. Plan. A Econ. Sp.* 23, 1025–1044. <https://doi.org/10.1068/a231025>
- 31 Fotheringham, A.S., Yang, W., Kang, W., 2017. Multiscale Geographically Weighted Regression  
32 (MGWR). *Ann. Am. Assoc. Geogr.* 107, 1247–1265.  
33 <https://doi.org/10.1080/24694452.2017.1352480>
- 34 Fransen, K., Farber, S., Deruyter, G., De Maeyer, P., 2018. A spatio-temporal accessibility measure for  
35 modelling activity participation in discretionary activities. *Travel Behav. Soc.* 10, 10–20.  
36 <https://doi.org/10.1016/j.tbs.2017.09.002>
- 37 Getis, A., Ord, J.K., 1992. The Analysis of Spatial Association by Use of Distance Statistics. *Geogr.*  
38 *Anal.* 24, 189–206. <https://doi.org/10.1111/j.1538-4632.1992.tb00261.x>
- 39 Gollini, I., Lu, B., Charlton, M., Brunsdon, C., Harris, P., 2015. GWmodel : An R Package for Exploring  
40 Spatial Heterogeneity Using Geographically Weighted Models. *J. Stat. Softw.* 63.  
41 <https://doi.org/10.18637/jss.v063.i17>
- 42 González, M.C., Hidalgo, C.A., Barabási, A.-L., 2008. Understanding individual human mobility  
43 patterns. *Nature* 453, 779–782. <https://doi.org/10.1038/nature06958>
- 44 Google LLC, 2020. Google COVID-19 Community Mobility Reports [WWW Document]. URL

- 1 <https://www.google.com/covid19/mobility/> (accessed 10.14.20).
- 2 Hanson, S., Hanson, P., 1981. The Travel-Activity Patterns of Urban Residents: Dimensions and  
3 Relationships to Sociodemographic Characteristics. *Econ. Geogr.* 57, 332.  
4 <https://doi.org/10.2307/144213>
- 5 Hanson, S., Schwab, M., 1987. Accessibility and Intraurban Travel. *Environ. Plan. A Econ. Sp.* 19, 735–  
6 748. <https://doi.org/10.1068/a190735>
- 7 Harris, R., 2020. Exploring the neighbourhood-level correlates of Covid-19 deaths in London using a  
8 difference across spatial boundaries method. *Health Place* 66, 102446.  
9 <https://doi.org/10.1016/j.healthplace.2020.102446>
- 10 HM Government, 2020. Our plan to rebuild: The UK Government’s COVID-19 recovery strategy  
11 [WWW Document]. URL  
12 [https://assets.publishing.service.gov.uk/government/uploads/system/uploads/attachment\\_data/](https://assets.publishing.service.gov.uk/government/uploads/system/uploads/attachment_data/file/884760/Our_plan_to_rebuild_The_UK_Government_s_COVID-19_recovery_strategy.pdf)  
13 [file/884760/Our\\_plan\\_to\\_rebuild\\_The\\_UK\\_Government\\_s\\_COVID-19\\_recovery\\_strategy.pdf](https://assets.publishing.service.gov.uk/government/uploads/system/uploads/attachment_data/file/884760/Our_plan_to_rebuild_The_UK_Government_s_COVID-19_recovery_strategy.pdf)  
14 (accessed 10.14.20).
- 15 Hoteit, S., Secci, S., Sobolevsky, S., Ratti, C., Pujolle, G., 2014. Estimating human trajectories and  
16 hotspots through mobile phone data. *Comput. Networks* 64, 296–307.  
17 <https://doi.org/10.1016/j.comnet.2014.02.011>
- 18 Iacobucci, G., 2020. Covid-19: UK lockdown is “crucial” to saving lives, say doctors and scientists. *BMJ*  
19 *m1204*. <https://doi.org/10.1136/bmj.m1204>
- 20 Jacobsen, G.D., Jacobsen, K.H., 2020. Statewide COVID-19 Stay-at-Home Orders and Population  
21 Mobility in the United States. *World Med. Heal. Policy* 12, 347–356.  
22 <https://doi.org/10.1002/wmh3.350>
- 23 Jarvis, C.I., Van Zandvoort, K., Gimma, A., Prem, K., Klepac, P., Rubin, G.J., Edmunds, W.J., 2020.  
24 Quantifying the impact of physical distance measures on the transmission of COVID-19 in the  
25 UK. *BMC Med.* 18, 124. <https://doi.org/10.1186/s12916-020-01597-8>
- 26 Jordan, R.E., Adab, P., Cheng, K.K., 2020. Covid-19: risk factors for severe disease and death. *BMJ*  
27 368, m1198. <https://doi.org/10.1136/bmj.m1198>
- 28 Kraemer, M.U.G., Yang, C.-H., Gutierrez, B., Wu, C.-H., Klein, B., Pigott, D.M., du Plessis, L., Faria,  
29 N.R., Li, R., Hanage, W.P., Brownstein, J.S., Layan, M., Vespignani, A., Tian, H., Dye, C., Pybus,  
30 O.G., Scarpino, S. V., 2020. The effect of human mobility and control measures on the COVID-  
31 19 epidemic in China. *Science* (80-. ). 368, 493–497. <https://doi.org/10.1126/science.abb4218>
- 32 Li, Z., Fotheringham, A.S., Oshan, T.M., Wolf, L.J., 2020. Measuring Bandwidth Uncertainty in  
33 Multiscale Geographically Weighted Regression Using Akaike Weights. *Ann. Am. Assoc. Geogr.*  
34 0, 1-. <https://doi.org/10.1080/24694452.2019.1704680>
- 35 Lindeman, R.H., Merenda, P.F., Gold, R.Z., 1980. *Introduction to Bivariate and Multivariate Analysis.*  
36 Scott Foresman & Co.
- 37 Lu, J., Zhou, S., Liu, L., Li, Q., 2020. You are where you go: Inferring residents’ income level through  
38 daily activity and geographic exposure. *Cities* 102984.  
39 <https://doi.org/10.1016/j.cities.2020.102984>
- 40 Lucas, K., Jones, P., 2009. *The Car in British Society.* London.
- 41 Miller, H.J., 2004. Tobler’s First Law and Spatial Analysis. *Ann. Assoc. Am. Geogr.* 94, 284–289.  
42 <https://doi.org/10.1111/j.1467-8306.2004.09402005.x>
- 43 Mollalo, A., Vahedi, B., Rivera, K.M., 2020. GIS-based spatial modeling of COVID-19 incidence rate in  
44 the continental United States. *Sci. Total Environ.* 728, 138884.

- 1 <https://doi.org/10.1016/j.scitotenv.2020.138884>
- 2 Neutens, T., Schwanen, T., Witlox, F., De Maeyer, P., 2010. Equity of Urban Service Delivery: A  
3 Comparison of Different Accessibility Measures. *Environ. Plan. A Econ. Sp.* 42, 1613–1635.  
4 <https://doi.org/10.1068/a4230>
- 5 Newman, P.W., Kenworthy, J.R., 1996. The land use—transport connection. *Land use policy* 13, 1–  
6 22. [https://doi.org/10.1016/0264-8377\(95\)00027-5](https://doi.org/10.1016/0264-8377(95)00027-5)
- 7 NHS Digital, 2020. COVID-19 NHS Situation Report [WWW Document]. URL  
8 <https://www.england.nhs.uk/statistics/statistical-work-areas/covid-19-hospital-activity/>  
9 (accessed 3.13.20).
- 10 O’ Lenick, C.R., Chang, H.H., Kramer, M.R., Winquist, A., Mulholland, J.A., Friberg, M.D., Sarnat, S.E.,  
11 2017. Ozone and childhood respiratory disease in three US cities: evaluation of effect measure  
12 modification by neighborhood socioeconomic status using a Bayesian hierarchical approach.  
13 *Environ. Heal.* 16, 36. <https://doi.org/10.1186/s12940-017-0244-2>
- 14 Oliver, N., Lepri, B., Sterly, H., Lambiotte, R., Deletaille, S., De Nadai, M., Letouzé, E., Salah, A.A.,  
15 Benjamins, R., Cattuto, C., Colizza, V., de Cordes, N., Fraiberger, S.P., Koebe, T., Lehmann, S.,  
16 Murillo, J., Pentland, A., Pham, P.N., Pivetta, F., Saramäki, J., Scarpino, S. V., Tizzoni, M.,  
17 Verhulst, S., Vinck, P., 2020. Mobile phone data for informing public health actions across the  
18 COVID-19 pandemic life cycle. *Sci. Adv.* 6, eabc0764. <https://doi.org/10.1126/sciadv.abc0764>
- 19 Ord, J.K., Getis, A., 1995. Local Spatial Autocorrelation Statistics: Distributional Issues and an  
20 Application. *Geogr. Anal.* 27, 286–306. <https://doi.org/10.1111/j.1538-4632.1995.tb00912.x>
- 21 Oshan, T., Li, Z., Kang, W., Wolf, L., Fotheringham, A., 2019. mgwr: A Python Implementation of  
22 Multiscale Geographically Weighted Regression for Investigating Process Spatial Heterogeneity  
23 and Scale. *ISPRS Int. J. Geo-Information* 8, 269. <https://doi.org/10.3390/ijgi8060269>
- 24 Oshan, T.M., Smith, J.P., Fotheringham, A.S., 2020. Targeting the spatial context of obesity  
25 determinants via multiscale geographically weighted regression. *Int. J. Health Geogr.* 19.  
26 <https://doi.org/10.1186/s12942-020-00204-6>
- 27 Pappalardo, L., Simini, F., Barlacchi, G., Pellungrini, R., 2019. scikit-mobility: a Python library for the  
28 analysis, generation and risk assessment of mobility data.
- 29 Pappalardo, L., Simini, F., Rinzivillo, S., Pedreschi, D., Giannotti, F., Barabási, A.-L., 2015. Returners  
30 and explorers dichotomy in human mobility. *Nat. Commun.* 6, 8166.  
31 <https://doi.org/10.1038/ncomms9166>
- 32 Pepe, E., Bajardi, P., Gauvin, L., Privitera, F., Lake, B., Cattuto, C., Tizzoni, M., 2020. COVID-19  
33 outbreak response, a dataset to assess mobility changes in Italy following national lockdown.  
34 *Sci. Data* 7, 230. <https://doi.org/10.1038/s41597-020-00575-2>
- 35 Perone, G., 2021. The determinants of COVID-19 case fatality rate (CFR) in the Italian regions and  
36 provinces: An analysis of environmental, demographic, and healthcare factors. *Sci. Total*  
37 *Environ.* 755, 142523. <https://doi.org/10.1016/j.scitotenv.2020.142523>
- 38 Poom, A., Järv, O., Zook, M., Toivonen, T., 2020. COVID-19 is spatial: Ensuring that mobile Big Data is  
39 used for social good. *Big Data Soc.* 7, 205395172095208.  
40 <https://doi.org/10.1177/2053951720952088>
- 41 Proto, E., Quintana-Domeque, C., 2020. COVID-19 and Mental Health Deterioration among BAME  
42 Groups in the UK (No. 8449), CESifo Working Paper.
- 43 Pullano, G., Valdano, E., Scarpa, N., Rubrichi, S., Colizza, V., 2020. Population mobility reductions  
44 during COVID-19 epidemic in France under lockdown. *medRxiv* 1–22.

- 1 <https://doi.org/10.1101/2020.05.29.20097097>
- 2 Qian, M., Saunders, A., Pesch, D., Reece, S., Lee, W. Do, Dong, X., Lambiotte, R., Kruitwagen, L., 2020.
- 3 Oxford COVID-19 Impact Monitor [WWW Document]. URL <https://www.oxford-covid-19.com>
- 4 (accessed 10.14.20).
- 5 Robinson, W.S., 1950. Ecological Correlations and the Behavior of Individuals. *Am. Sociol. Rev.* 15,
- 6 351. <https://doi.org/10.2307/2087176>
- 7 Santana, C., Botta, F., Barbosa, H., Privitera, F., Menezes, R., Clemente, R. Di, 2020. Analysis of
- 8 human mobility in the UK during the COVID-19 pandemic.
- 9 Scala, A., Flori, A., Spelta, A., Brugnoli, E., Cinelli, M., Quattrocioni, W., Pammolli, F., 2020. Time,
- 10 space and social interactions: exit mechanisms for the Covid-19 epidemics. *Sci. Rep.* 10, 13764.
- 11 <https://doi.org/10.1038/s41598-020-70631-9>
- 12 Scally, G., Jacobson, B., Abbasi, K., 2020. The UK's public health response to covid-19. *BMJ* 369,
- 13 m1932. <https://doi.org/10.1136/bmj.m1932>
- 14 Schimek, P., 1996. Household Motor Vehicle Ownership and Use: How Much Does Residential
- 15 Density Matter? *Transp. Res. Rec. J. Transp. Res. Board* 1552, 120–125.
- 16 <https://doi.org/10.1177/0361198196155200117>
- 17 Schwanen, T., Kwan, M.-P., Ren, F., 2008. How fixed is fixed? Gendered rigidity of space–time
- 18 constraints and geographies of everyday activities. *Geoforum* 39, 2109–2121.
- 19 <https://doi.org/10.1016/j.geoforum.2008.09.002>
- 20 Tobler, W.R., 1970. A Computer Movie Simulating Urban Growth in the Detroit Region. *Econ. Geogr.*
- 21 46, 234. <https://doi.org/10.2307/143141>
- 22 Usher, K., Bhullar, N., Durkin, J., Gyamfi, N., Jackson, D., 2020. Family violence and COVID-19:
- 23 Increased vulnerability and reduced options for support. *Int. J. Ment. Health Nurs.* inm.12735.
- 24 <https://doi.org/10.1111/inm.12735>
- 25 Van Acker, V., Van Wee, B., Witlox, F., 2010. When Transport Geography Meets Social Psychology:
- 26 Toward a Conceptual Model of Travel Behaviour. *Transp. Rev.* 30, 219–240.
- 27 <https://doi.org/10.1080/01441640902943453>
- 28 van de Coevering, P., Schwanen, T., 2006. Re-evaluating the impact of urban form on travel
- 29 patterns in Europe and North-America. *Transp. Policy* 13, 229–239.
- 30 <https://doi.org/10.1016/j.tranpol.2005.10.001>
- 31 Witteveen, D., Velthorst, E., 2020. Economic hardship and mental health complaints during COVID-
- 32 19. *Proc. Natl. Acad. Sci.* 202009609. <https://doi.org/10.1073/pnas.2009609117>
- 33 Xiong, Y., Wang, Y., Chen, F., Zhu, M., 2020. Spatial Statistics and Influencing Factors of the COVID-19
- 34 Epidemic at Both Prefecture and County Levels in Hubei Province, China. *Int. J. Environ. Res.*
- 35 *Public Health* 17, 3903. <https://doi.org/10.3390/ijerph17113903>
- 36 Xu, Y., Belyi, A., Bojic, I., Ratti, C., 2018. Human mobility and socioeconomic status: Analysis of
- 37 Singapore and Boston. *Comput. Environ. Urban Syst.* 72, 51–67.
- 38 <https://doi.org/10.1016/j.compenvurbsys.2018.04.001>
- 39 Yoo, E.-H., Brown, P., Eum, Y., 2018. Ambient air quality and spatio-temporal patterns of
- 40 cardiovascular emergency department visits. *Int. J. Health Geogr.* 17, 18.
- 41 <https://doi.org/10.1186/s12942-018-0138-8>
- 42

## Tables

**Table 1. Descriptive statistics of variables.**

| Domains                                     |                      | Variables                                                                     | Min.                                                                      | Mean        | Median      | Max.        | SD          | Skew         |
|---------------------------------------------|----------------------|-------------------------------------------------------------------------------|---------------------------------------------------------------------------|-------------|-------------|-------------|-------------|--------------|
| Mobility reduction relative to 3 March 2020 |                      | 24 March 2020                                                                 | 0.37                                                                      | 0.62        | 0.61        | 0.82        | 0.1         | 0.1          |
|                                             |                      | 31 March 2020                                                                 | 0.44                                                                      | 0.66        | 0.66        | 0.83        | 0.09        | 0.05         |
|                                             |                      | 7 April 2020                                                                  | 0.26                                                                      | 0.64        | 0.63        | 0.85        | 0.1         | -0.11        |
|                                             |                      | 14 April 2020                                                                 | 0.38                                                                      | 0.62        | 0.61        | 0.83        | 0.1         | 0.17         |
| Socioeconomic status                        | Income               | Share of households in lowest household income quintile at national level     | 0.13                                                                      | 0.18        | 0.17        | 0.4         | 0.03        | 2.64         |
|                                             |                      | Share of households in median household income quintile at national level     | 0.1                                                                       | 0.22        | 0.22        | 0.25        | 0.02        | -1.57        |
|                                             |                      | <b>Share of households in top household income quintile at national level</b> | <b>0.03</b>                                                               | <b>0.19</b> | <b>0.17</b> | <b>0.4</b>  | <b>0.07</b> | <b>0.69</b>  |
|                                             | Education and skills | Share with no qualifications                                                  | 0.11                                                                      | 0.23        | 0.23        | 0.35        | 0.05        | 0.03         |
|                                             |                      | <b>Share of non-English speakers</b>                                          | <b>0.01</b>                                                               | <b>0.08</b> | <b>0.04</b> | <b>0.41</b> | <b>0.08</b> | <b>1.9</b>   |
|                                             | Occupation           | Share of Social Grade AB (upper middle class)                                 | 0.11                                                                      | 0.31        | 0.31        | 0.55        | 0.07        | 0.49         |
|                                             |                      | <b>Share of Social Grade C1 (lower middle class)</b>                          | <b>0.15</b>                                                               | <b>0.22</b> | <b>0.22</b> | <b>0.3</b>  | <b>0.03</b> | <b>-0.27</b> |
|                                             |                      | Share of Social Grade C2 (skilled working class)                              | 0.1                                                                       | 0.21        | 0.22        | 0.31        | 0.04        | -0.52        |
|                                             |                      | Share of Social Grade DE (semi-skilled working class and non-working)         | 0.07                                                                      | 0.17        | 0.16        | 0.37        | 0.05        | 0.66         |
|                                             | Housing type         | Share of social rented housing                                                | 0.06                                                                      | 0.18        | 0.15        | 0.44        | 0.07        | 1.39         |
|                                             |                      | Share of dwellings with ≥4 bedrooms                                           | 0.06                                                                      | 0.19        | 0.18        | 0.33        | 0.05        | 0.19         |
|                                             | Crime level          | Incidents of crime (per 1,000 inhabitants)                                    | 0.02                                                                      | 8.16        | 8.07        | 28.35       | 3.47        | 0.86         |
|                                             | Accessibility        | Residential density                                                           | <b>Resident population density (1,000 inhabitants per km<sup>2</sup>)</b> | <b>0.02</b> | <b>0.84</b> | <b>0.34</b> | <b>6.23</b> | <b>1.22</b>  |
| Car availability                            |                      | Share of households with 0 vehicle                                            | 0.1                                                                       | 0.26        | 0.23        | 0.65        | 0.12        | 1.47         |

|                     |                       |                                                                             |             |             |             |             |             |             |
|---------------------|-----------------------|-----------------------------------------------------------------------------|-------------|-------------|-------------|-------------|-------------|-------------|
|                     |                       | Share of households with 1 vehicle                                          | 0.3         | 0.42        | 0.43        | 0.5         | 0.03        | -1.68       |
|                     |                       | Share of households with 2 vehicles                                         | 0.04        | 0.24        | 0.26        | 0.39        | 0.07        | -0.85       |
|                     |                       | Share of households with ≥3 vehicles                                        | 0.01        | 0.07        | 0.07        | 0.14        | 0.03        | -0.18       |
|                     | Clinical capacity     | ICU beds (per 1,000 inhabitants)                                            | 0           | 0.07        | 0.04        | 0.89        | 0.11        | 3.49        |
|                     |                       | Number of GP practices (per 1,000 inhabitants)                              | 0.07        | 0.12        | 0.12        | 0.3         | 0.03        | 1.35        |
|                     |                       | Hospitals (per 1,000 inhabitants)                                           | 0.11        | 0.18        | 0.17        | 0.38        | 0.03        | 1.5         |
|                     | Allowed premises      | Parks (per 1,000 inhabitants)                                               | 0.05        | 0.17        | 0.15        | 0.48        | 0.08        | 0.99        |
|                     |                       | Supermarkets (per 1,000 inhabitants)                                        | 0.63        | 1.07        | 0.98        | 2.32        | 0.3         | 1.36        |
| Activity commitment | Economic activity     | Share of part-time workers in the resident population aged 16-74            | 0.07        | 0.14        | 0.14        | 0.16        | 0.02        | -1.72       |
|                     |                       | Share of full-time worker in the resident population aged 16-74             | 0.22        | 0.39        | 0.39        | 0.51        | 0.04        | -0.2        |
|                     |                       | <b>Share of self-employed workers in the resident population aged 16-74</b> | <b>0.05</b> | <b>0.1</b>  | <b>0.1</b>  | <b>0.16</b> | <b>0.02</b> | <b>0.12</b> |
| Population Health   | General health status | Share of population in good health                                          | 0.74        | 0.81        | 0.81        | 0.88        | 0.03        | -0.11       |
|                     |                       | Share of population in fair health                                          | 0.09        | 0.13        | 0.13        | 0.17        | 0.02        | -0.14       |
|                     |                       | <b>Share of population in bad health</b>                                    | <b>0.03</b> | <b>0.06</b> | <b>0.05</b> | <b>0.09</b> | <b>0.01</b> | <b>0.49</b> |

*Notes:* Variables in bold have been included in regression models below; variables for racial/ethnic composition of resident populations had to be excluded because of high correlations with share of non-English speakers and resident population density.



**Table 2. Spatial regression modelling of mobility reduction, by date.**

|                                                                        | 24 March 2020       |                      | 31 March 2020        |                      | 7 April 2020        |                      | 14 April 2020       |                     |
|------------------------------------------------------------------------|---------------------|----------------------|----------------------|----------------------|---------------------|----------------------|---------------------|---------------------|
|                                                                        | SLM                 | SEM                  | SLM                  | SEM                  | SLM                 | SEM                  | SLM                 | SEM                 |
|                                                                        | Coeff (SE)          | Coeff (SE)           | Coeff (SE)           | Coeff (SE)           | Coeff (SE)          | Coeff (SE)           | Coeff (SE)          | Coeff (SE)          |
| <b>(Intercept)</b>                                                     | -0.009<br>(0.037)   | 0<br>(0.041)         | -0.008<br>(0.038)    | 0<br>(0.04)          | -0.013<br>(0.037)   | 0.002<br>(0.053)     | -0.012<br>(0.035)   | -0.001<br>(0.045)   |
| <b>Socio-economic status</b>                                           |                     |                      |                      |                      |                     |                      |                     |                     |
| Share of households in top household income quintile at national level | 0.666***<br>(0.083) | 0.795***<br>(0.073)  | 0.7***<br>(0.086)    | 0.806***<br>(0.073)  | 0.612***<br>(0.084) | 0.794***<br>(0.082)  | 0.636***<br>(0.08)  | 0.764***<br>(0.074) |
| Share of non-English speaker                                           | 0.287***<br>(0.073) | 0.365***<br>(0.071)  | 0.336***<br>(0.076)  | 0.399***<br>(0.072)  | 0.248***<br>(0.074) | 0.374***<br>(0.078)  | 0.232***<br>(0.069) | 0.337***<br>(0.071) |
| Share of social grade C1 (lower middle class)                          | 0.428***<br>(0.062) | 0.492***<br>(0.062)  | 0.475***<br>(0.065)  | 0.535***<br>(0.062)  | 0.394***<br>(0.063) | 0.443***<br>(0.068)  | 0.429***<br>(0.06)  | 0.486***<br>(0.062) |
| <b>Accessibility</b>                                                   |                     |                      |                      |                      |                     |                      |                     |                     |
| Resident population density (1,000 inhabitants per km <sup>2</sup> )   | 0.284***<br>(0.08)  | 0.353***<br>(0.081)  | 0.284***<br>(0.082)  | 0.341***<br>(0.082)  | 0.267***<br>(0.081) | 0.31***<br>(0.088)   | 0.306***<br>(0.076) | 0.363***<br>(0.081) |
| <b>Activity commitments</b>                                            |                     |                      |                      |                      |                     |                      |                     |                     |
| Share of self-employed workers                                         | -0.186***<br>(0.06) | -0.196***<br>(0.063) | -0.229***<br>(0.062) | -0.245***<br>(0.064) | -0.24***<br>(0.061) | -0.238***<br>(0.069) | -0.2***<br>(0.057)  | -0.2***<br>(0.063)  |
| <b>Population health</b>                                               |                     |                      |                      |                      |                     |                      |                     |                     |
| Share of population in poor health                                     | 0.397***<br>(0.075) | 0.465***<br>(0.074)  | 0.435***<br>(0.078)  | 0.492***<br>(0.075)  | 0.335***<br>(0.076) | 0.446***<br>(0.082)  | 0.356***<br>(0.072) | 0.441***<br>(0.075) |
| <b>Spatial autoregressive parameters</b>                               |                     |                      |                      |                      |                     |                      |                     |                     |
| Spatial lag coefficient ( $\rho$ )                                     | 0.22**<br>(0.076)   | -                    | 0.178**<br>(0.078)   | -                    | 0.31***<br>(0.073)  | -                    | 0.272***<br>(0.072) | -                   |
| Spatial error coefficient ( $\lambda$ )                                | -                   | 0.077<br>(0.106)     | -                    | 0.039<br>(0.109)     | -                   | 0.28***<br>(0.094)   | -                   | 0.206*<br>(0.099)   |
| <b>Model fit metrics</b>                                               |                     |                      |                      |                      |                     |                      |                     |                     |
| Log-likelihood                                                         | -143.0              | -145.7               | -148.7               | -150.8               | -146.7              | -150.6               | -134.3              | -138.7              |
| Pseudo $R^2$                                                           | 0.738               | 0.729                | 0.721                | 0.714                | 0.726               | 0.715                | 0.76                | 0.749               |
| $AIC_{SLRM}$                                                           | 307.9               |                      | 317.8                |                      | 323.5               |                      | 296.6               |                     |
| $AIC_{SRM}$                                                            | 303                 | 309.5                | 315.4                | 319.7                | 311.5               | 319.3                | 286.6               | 295.3               |
| $\Delta AIC_{SRM} = (AIC_{SLRM} - AIC_{SRM})$                          | 4.9                 | -2.4                 | 2.4                  | -2.1                 | 12                  | 4.2                  | 10                  | 1.3                 |

Note: \* $p < 0.1$ ; \*\* $p < 0.05$ ; \*\*\* $p < 0.01$ .

**Table 3. Assessment of spatial heterogeneity in regression modelling, by date.**

| Modelling approach    | Model criterion                                   | 24 March | 31 March | 7 April | 14 April |
|-----------------------|---------------------------------------------------|----------|----------|---------|----------|
| <b>OLS-equivalent</b> | Adj. R <sup>2</sup>                               | 0.72     | 0.70     | 0.70    | 0.74     |
|                       | <i>AIC</i>                                        | 307.88   | 317.77   | 323.54  | 296.55   |
| <b>GWR</b>            | Adj. R <sup>2</sup>                               | 0.75     | 0.72     | 0.75    | 0.77     |
|                       | <i>AIC</i>                                        | 273.87   | 291.21   | 270.19  | 256.79   |
|                       | $AIC_{SLRM} - AIC_{GWR}$                          | 34.00    | 26.57    | 53.35   | 39.76    |
|                       | <i>AICc</i>                                       | 296.11   | 313.44   | 292.42  | 279.03   |
| <b>MGWR</b>           | Adj. R <sup>2</sup>                               | 0.75     | 0.73     | 0.81    | 0.77     |
|                       | RSS                                               | 42.32    | 43.97    | 27.15   | 38.26    |
|                       | <i>AICc</i>                                       | 292.49   | 310.64   | 259.29  | 275.87   |
|                       | $\Delta AIC_{cMGWR} = (AIC_{cGWR} - AIC_{cMGWR})$ | 3.61     | 2.80     | 33.13   | 3.16     |

<sup>†</sup> *AICc* is often used when the ratio of estimated coefficients to cases is small.

**Table 4A. Results for MGWR modelling of mobility reduction, 24 and 31 March.**

|                                                                        | 24 March 2020 |         |        |         |       |            | 31 March 2020 |         |        |         |       |            |
|------------------------------------------------------------------------|---------------|---------|--------|---------|-------|------------|---------------|---------|--------|---------|-------|------------|
|                                                                        | Min.          | 1st Qu. | Median | 3rd Qu. | Max.  | Band width | Min.          | 1st Qu. | Median | 3rd Qu. | Max.  | Band width |
| <b>(Intercept)</b>                                                     | 0.14          | 0.15    | 0.16   | 0.177   | 0.19  | 188        | 0.12          | 0.13    | 0.14   | 0.140   | 0.15  | 188        |
| <b><i>Socio-economic status</i></b>                                    |               |         |        |         |       |            |               |         |        |         |       |            |
| Share of households in top household income quintile at national level | 0.74          | 0.74    | 0.85   | 1.058   | 1.09  | 148        | 0.73          | 0.73    | 0.80   | 0.962   | 1.00  | 164        |
| Share of non-English speaker                                           | 0.32          | 0.33    | 0.35   | 0.354   | 0.36  | 188        | 0.36          | 0.37    | 0.38   | 0.394   | 0.40  | 188        |
| Share of social grade C1 (lower middle class)                          | 0.40          | 0.42    | 0.46   | 0.464   | 0.47  | 188        | 0.47          | 0.48    | 0.50   | 0.500   | 0.51  | 188        |
| <b><i>Accessibility</i></b>                                            |               |         |        |         |       |            |               |         |        |         |       |            |
| Resident population density (1,000 inhabitants per km <sup>2</sup> )   | 0.23          | 0.28    | 0.51   | 0.759   | 1.09  | 62         | 0.20          | 0.27    | 0.41   | 0.587   | 1.17  | 40         |
| <b><i>Activity commitments</i></b>                                     |               |         |        |         |       |            |               |         |        |         |       |            |
| Share of self-employed workers                                         | -0.20         | -0.18   | -0.14  | -0.123  | -0.11 | 186        | -0.23         | -0.21   | -0.18  | -0.164  | -0.16 | 188        |
| <b><i>Population health</i></b>                                        |               |         |        |         |       |            |               |         |        |         |       |            |
| Share of population in poor health                                     | 0.49          | 0.50    | 0.53   | 0.563   | 0.57  | 188        | 0.50          | 0.51    | 0.53   | 0.556   | 0.56  | 188        |
| <b>Model fit metrics</b>                                               |               |         |        |         |       |            |               |         |        |         |       |            |
| Residual sum of squares (RSS)                                          |               |         |        |         |       | 42.32      |               |         |        |         |       | 43.97      |
| $AIC_c$                                                                |               |         |        |         |       | 292.49     |               |         |        |         |       | 310.64     |
| $R^2$                                                                  |               |         |        |         |       | 0.78       |               |         |        |         |       | 0.77       |
| Adj. $R^2$                                                             |               |         |        |         |       | 0.75       |               |         |        |         |       | 0.73       |

**Table 4B. Results for MGWR modelling of mobility reduction, 7 and 14 April.**

|                                                                        | 7 April 2020 |         |        |         |       |            | 14 April 2020 |         |        |         |       |            |
|------------------------------------------------------------------------|--------------|---------|--------|---------|-------|------------|---------------|---------|--------|---------|-------|------------|
|                                                                        | Min.         | 1st Qu. | Median | 3rd Qu. | Max.  | Band width | Min.          | 1st Qu. | Median | 3rd Qu. | Max.  | Band width |
| <b>(Intercept)</b>                                                     | 0.31         | 0.32    | 0.33   | 0.338   | 0.34  | 188        | -0.21         | -0.07   | 0.14   | 0.294   | 0.34  | 63         |
| <b><i>Socio-economic status</i></b>                                    |              |         |        |         |       |            |               |         |        |         |       |            |
| Share of households in top household income quintile at national level | 0.65         | 0.66    | 0.92   | 1.543   | 1.76  | 67         | 0.68          | 0.68    | 0.80   | 1.059   | 1.09  | 148        |
| Share of non-English speaker                                           | 0.38         | 0.38    | 0.39   | 0.394   | 0.40  | 188        | 0.27          | 0.30    | 0.34   | 0.352   | 0.35  | 181        |
| Share of social grade C1 (lower middle class)                          | 0.37         | 0.38    | 0.39   | 0.396   | 0.40  | 188        | 0.40          | 0.41    | 0.41   | 0.412   | 0.43  | 188        |
| <b><i>Accessibility</i></b>                                            |              |         |        |         |       |            |               |         |        |         |       |            |
| Resident population density (1,000 inhabitants per km <sup>2</sup> )   | -0.24        | 0.19    | 0.39   | 0.755   | 1.85  | 22         | 0.27          | 0.27    | 0.27   | 0.286   | 0.30  | 188        |
| <b><i>Activity commitments</i></b>                                     |              |         |        |         |       |            |               |         |        |         |       |            |
| Share of self-employed workers                                         | -0.30        | -0.26   | -0.22  | -0.163  | -0.16 | 153        | -0.27         | -0.25   | -0.20  | -0.177  | -0.16 | 167        |
| <b><i>Population health</i></b>                                        |              |         |        |         |       |            |               |         |        |         |       |            |
| Share of population in poor health                                     | 0.61         | 0.62    | 0.62   | 0.626   | 0.64  | 188        | 0.51          | 0.51    | 0.53   | 0.547   | 0.55  | 188        |
| <b>Model fit metrics</b>                                               |              |         |        |         |       |            |               |         |        |         |       |            |
| Residual sum of squares (RSS)                                          |              |         |        |         |       | 27.15      |               |         |        |         |       | 38.26      |
| $AIC_c$                                                                |              |         |        |         |       | 259.29     |               |         |        |         |       | 275.87     |
| $R^2$                                                                  |              |         |        |         |       | 0.86       |               |         |        |         |       | 0.80       |
| Adj. $R^2$                                                             |              |         |        |         |       | 0.81       |               |         |        |         |       | 0.77       |

**Table 5. Locally specific coefficients in MGWR model, 7 April 2020.**

| Local authority districts                                              | City of London | City of Bristol | Birmingham | Manchester | Leeds | Newcastle upon Tyne |
|------------------------------------------------------------------------|----------------|-----------------|------------|------------|-------|---------------------|
| <b>(Intercept)</b>                                                     | 0.09           | 0.10            | 0.08       | 0.12       | 0.05  | 0.11                |
| <b><i>Socio-economic status</i></b>                                    |                |                 |            |            |       |                     |
| Share of households in top household income quintile at national level | 0.65           | 0.73            | 0.79       | 1.08       | 1.19  | 1.31                |
| Share of non-English speaker                                           | 0.39           | 0.29            | 0.13       | 0.03       | 0.15  | 0.17                |
| Share of social grade C1 (lower middle class)                          | 0.50           | 0.46            | 0.38       | 0.26       | 0.34  | 0.30                |
| <b><i>Accessibility</i></b>                                            |                |                 |            |            |       |                     |
| Resident population density (1,000 inhabitants per km <sup>2</sup> )   | 0.34           | 0.41            | 0.62       | 0.88       | 0.74  | 0.77                |
| <b><i>Activity commitments</i></b>                                     |                |                 |            |            |       |                     |
| Share of self-employed workers                                         | -0.17          | -0.25           | -0.25      | -0.26      | -0.40 | -0.35               |
| <b><i>Population health</i></b>                                        |                |                 |            |            |       |                     |
| Share of population in poor health                                     | 0.44           | 0.39            | 0.36       | 0.39       | 0.42  | 0.47                |
| <b><i>Model fit metrics</i></b>                                        |                |                 |            |            |       |                     |
| Pseudo $R^2$                                                           | 0.87           | 0.64            | 0.71       | 0.66       | 0.72  | 0.73                |

Figures

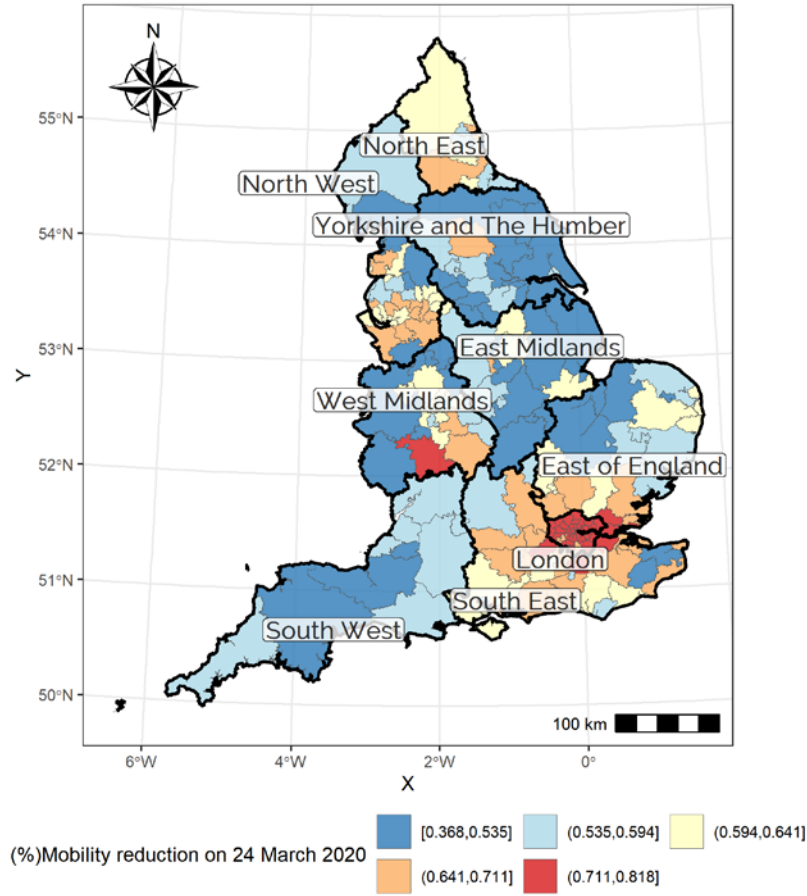

a. 24 March

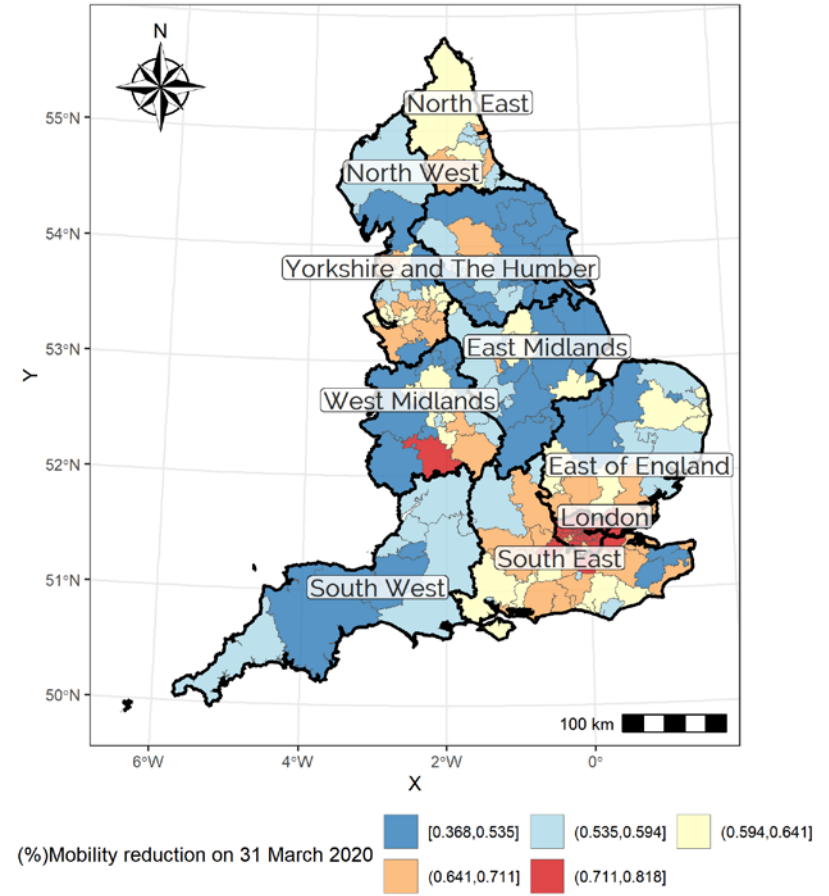

b. 31 March

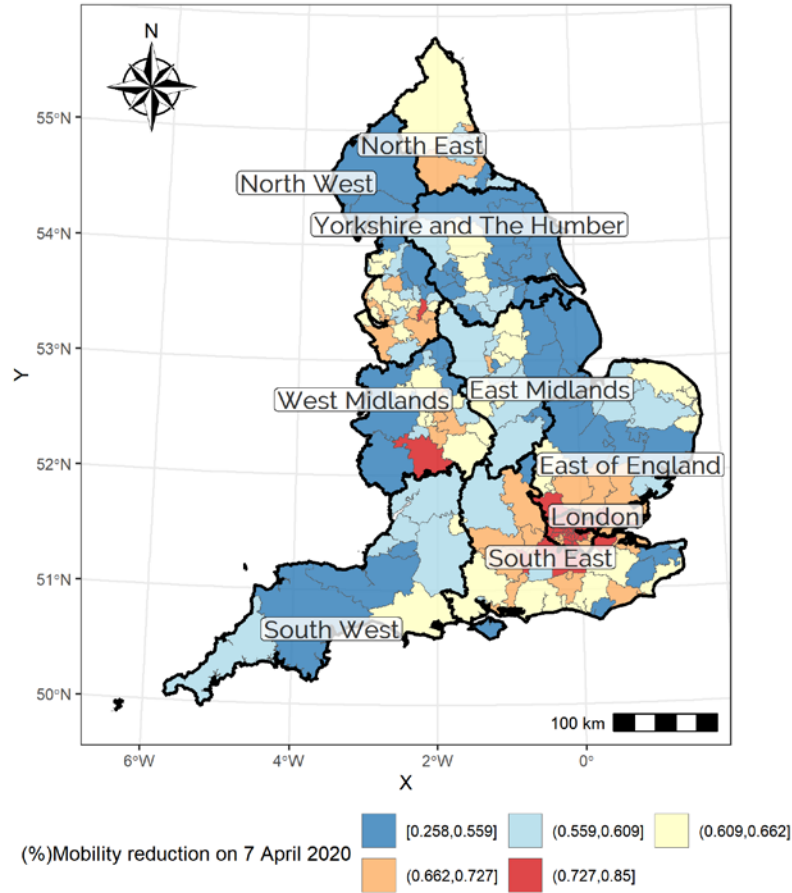

c. 7 April

Figure 1. Maps of mobility reduction across England, by date.

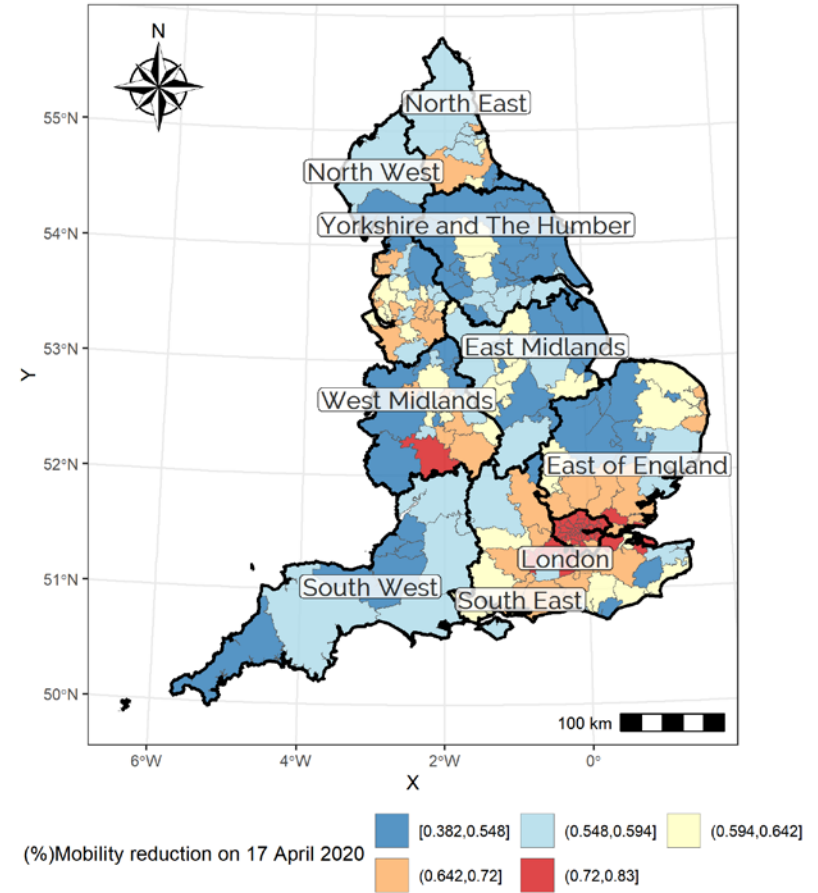

d. 14 April



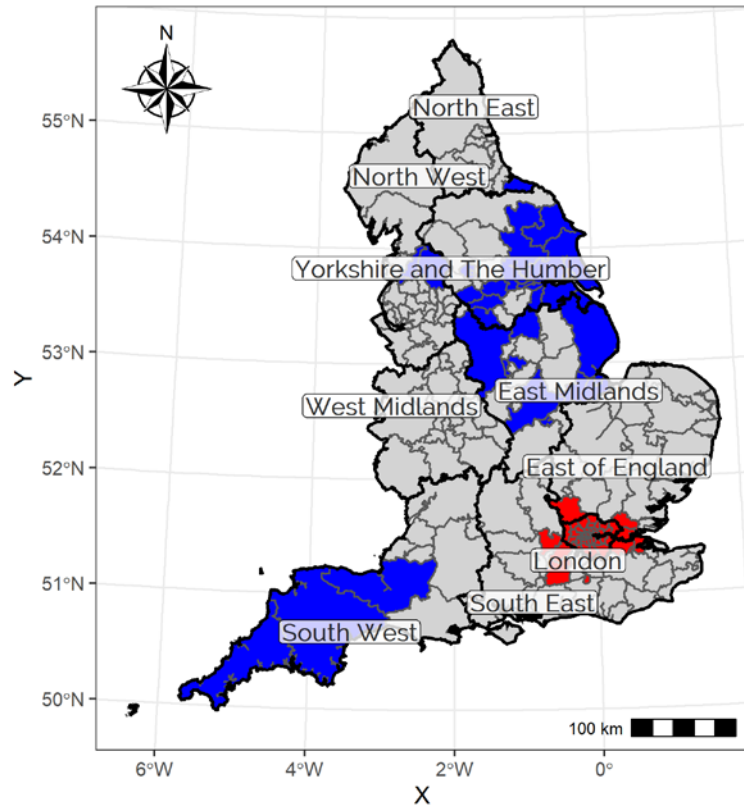

a. 24 March

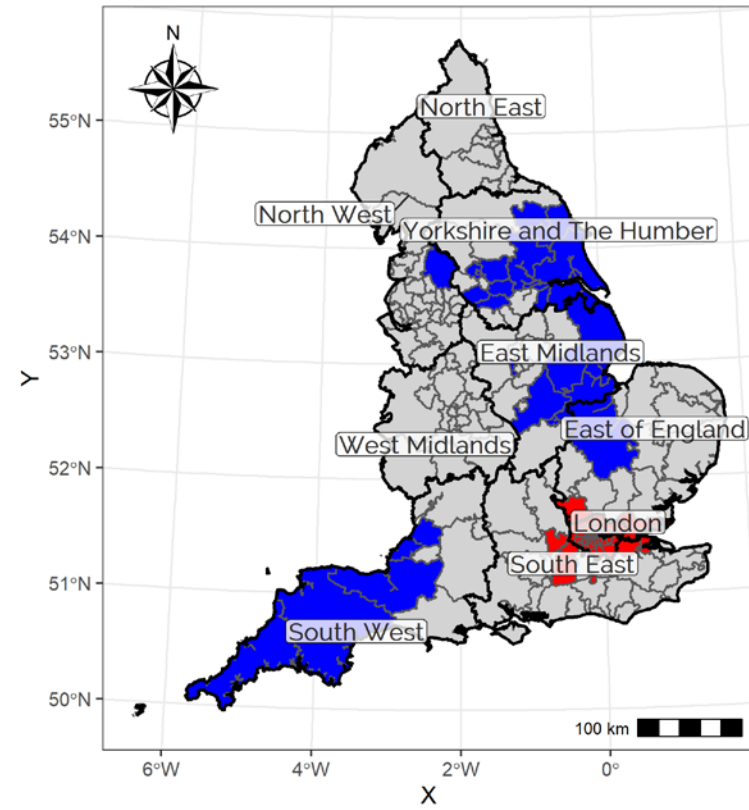

b. 31 March

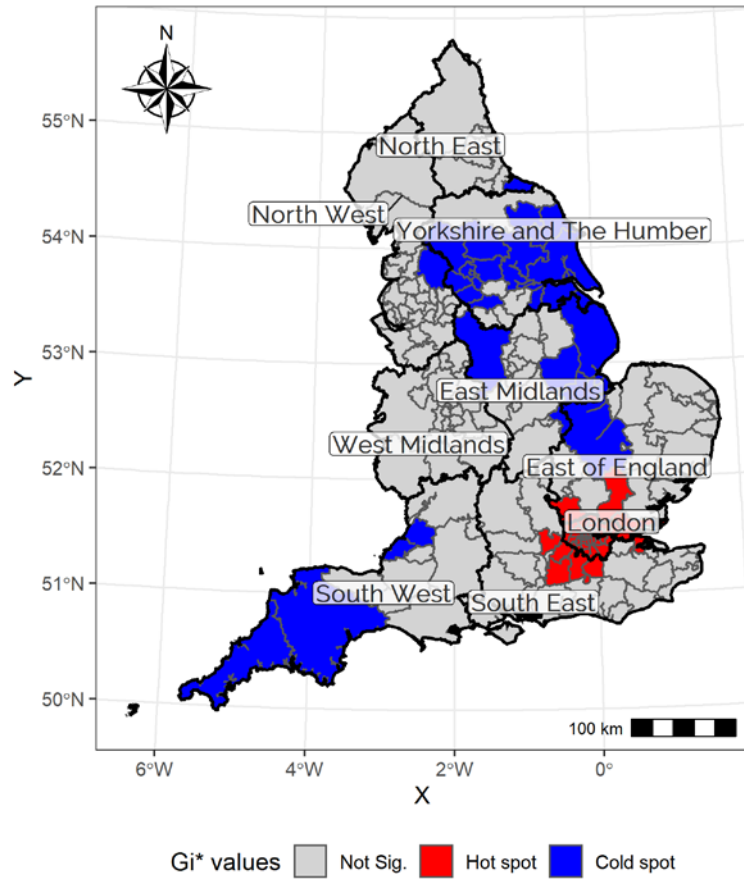

c. 7 April

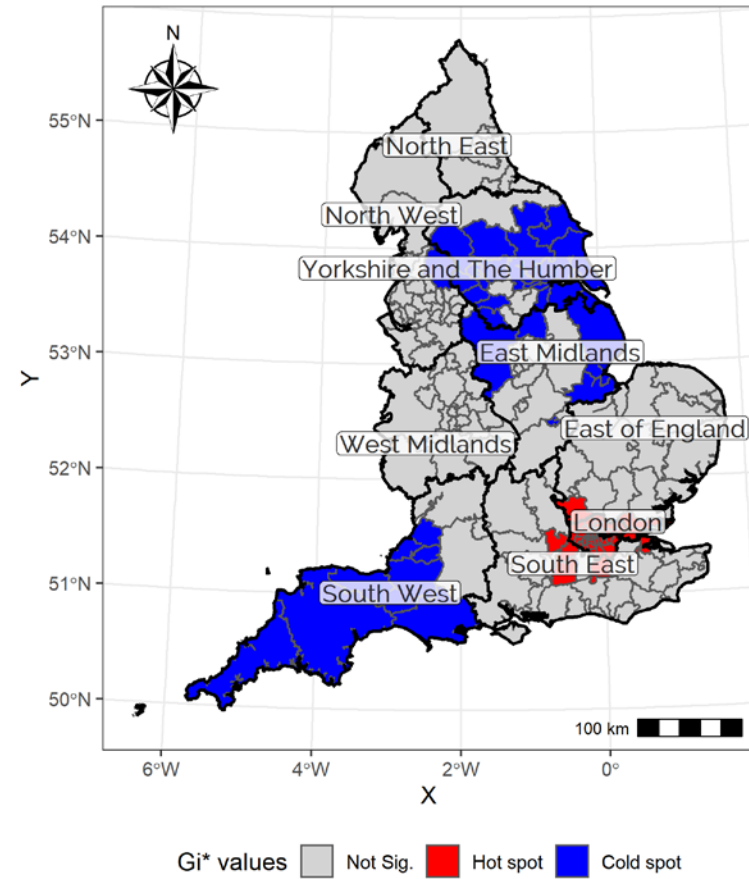

d. 14 April

Figure 2. Maps of hot and cold spots in mobility reduction across England, by date.

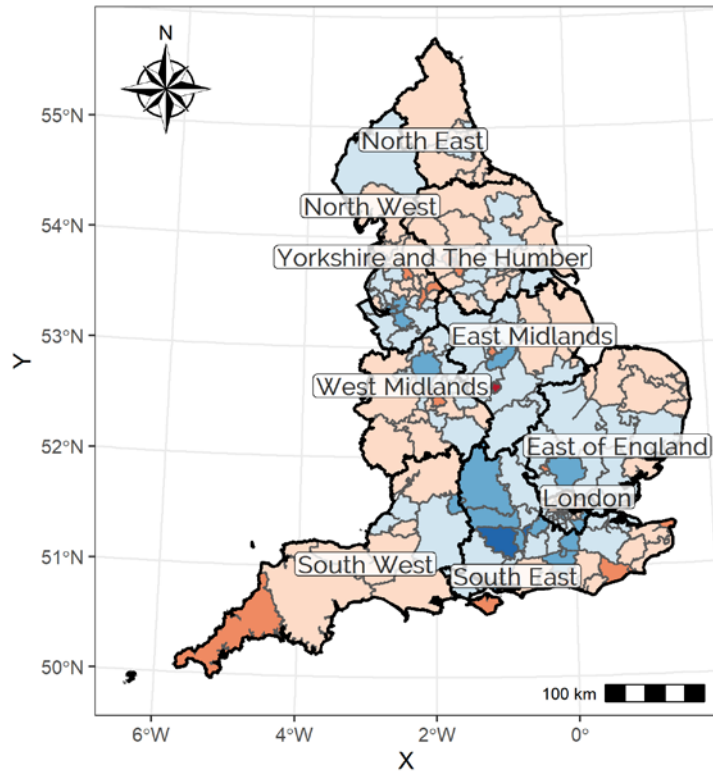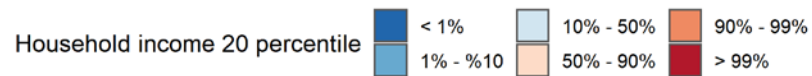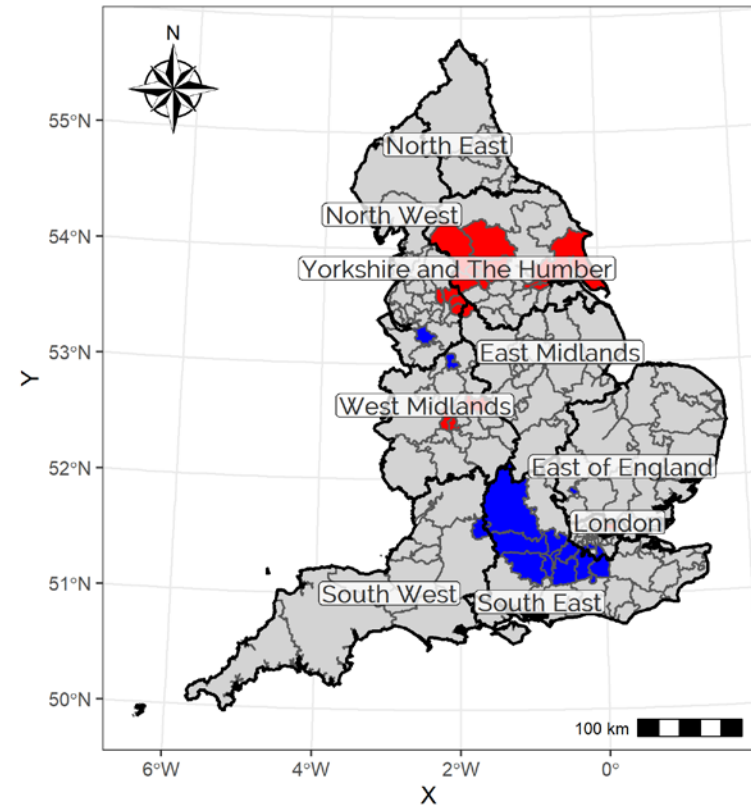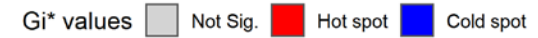

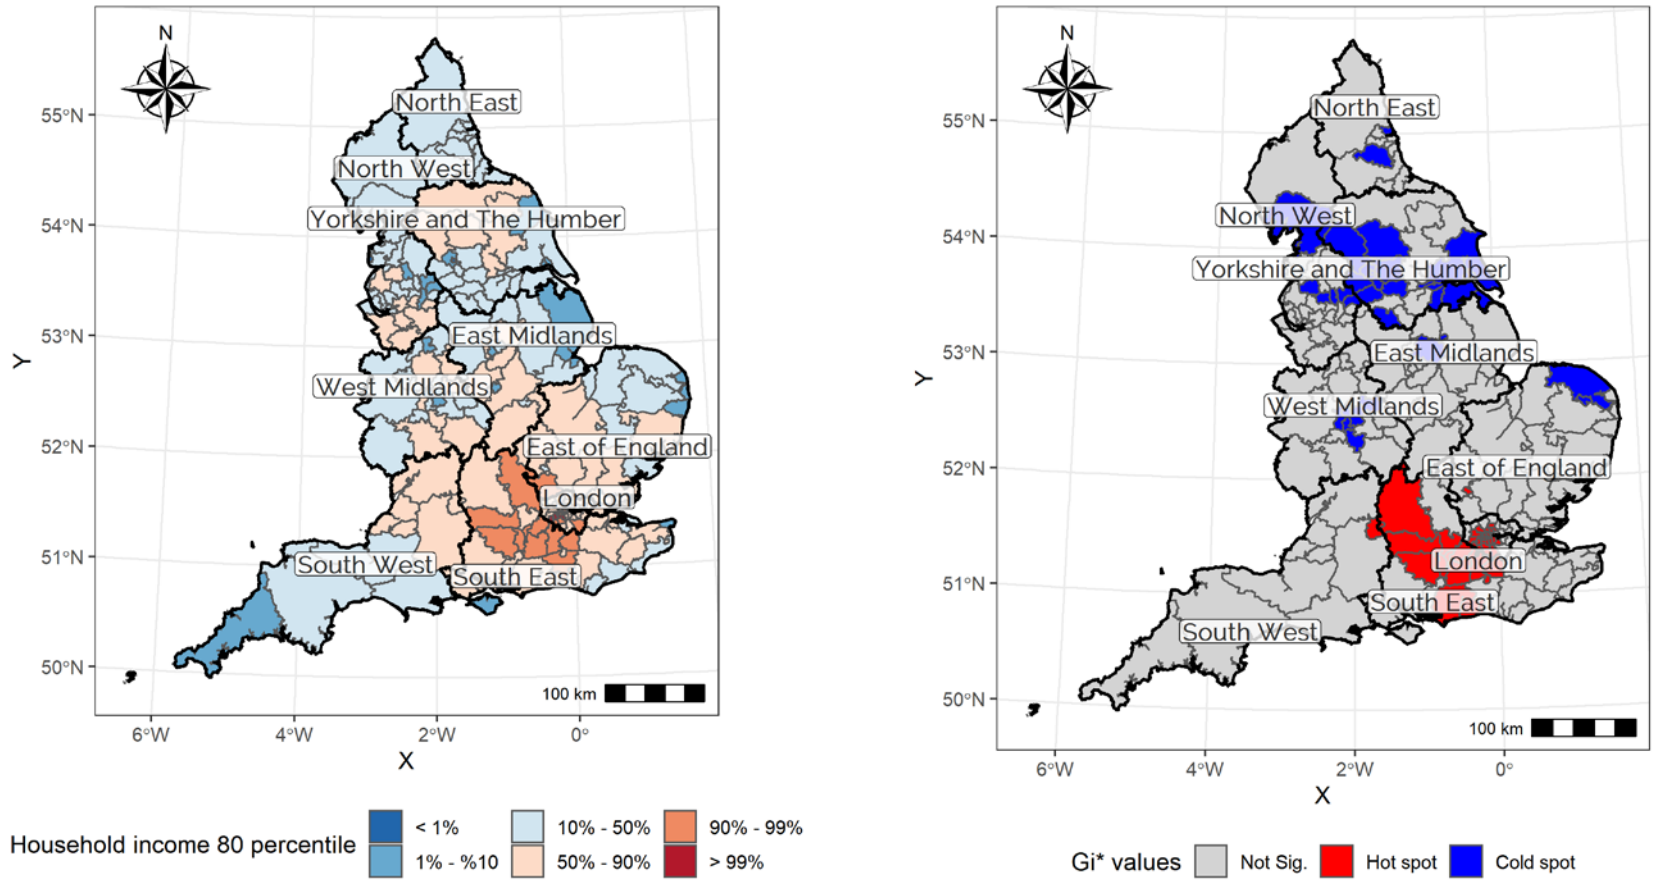

Figure 3. Spatial distribution of the lowest (above) and highest quintiles (below) of household income across England.

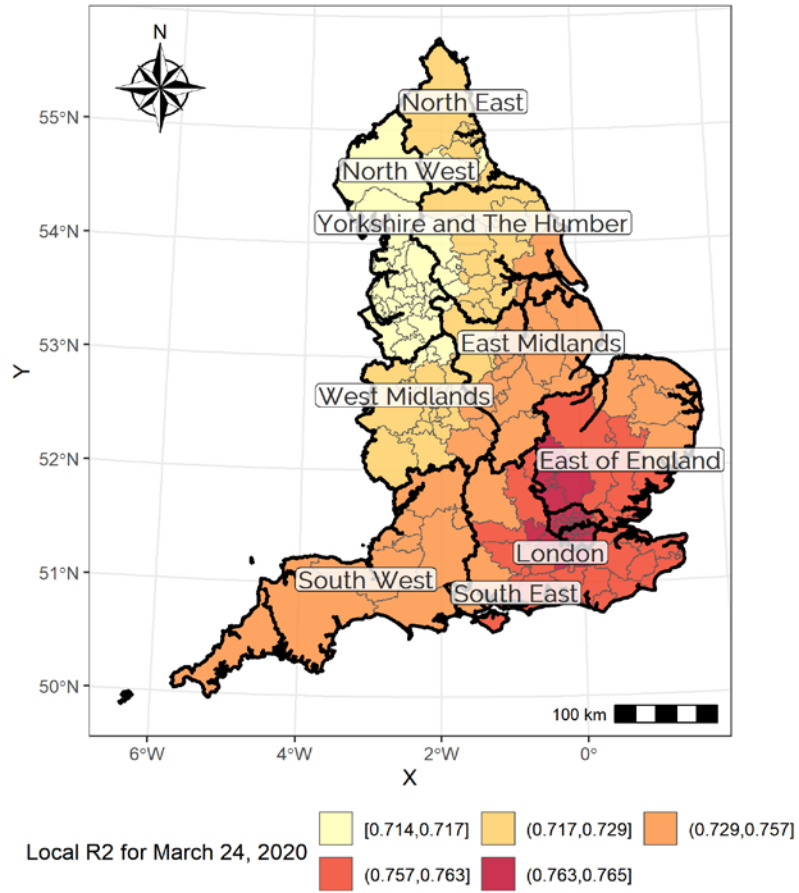

a. 24 March

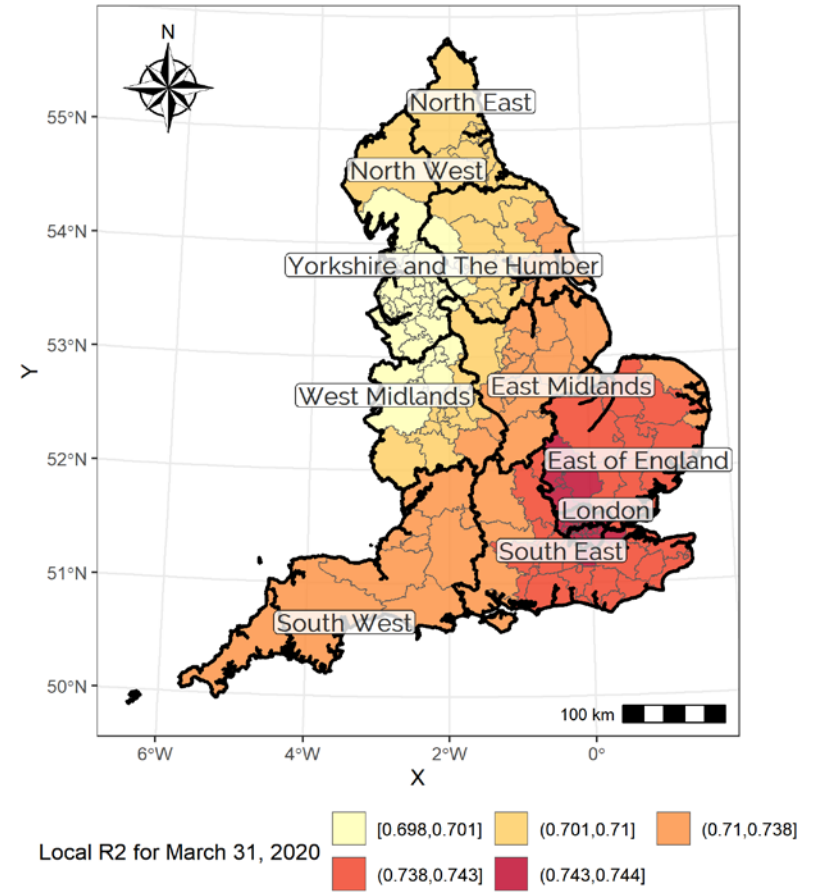

b. 31 March

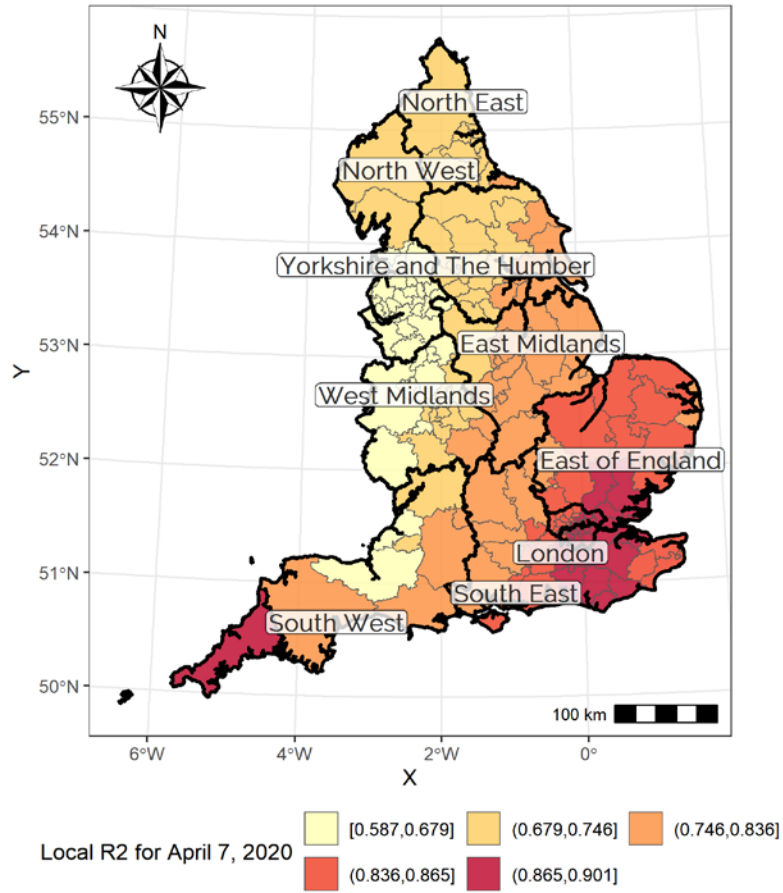

c. 7 April

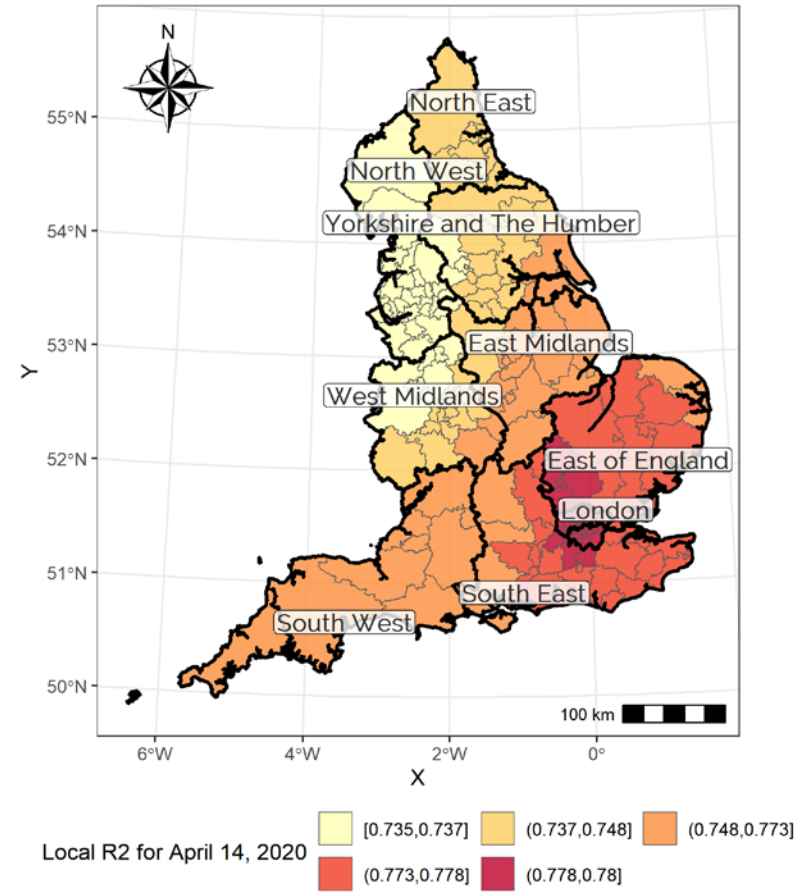

d. 14 April

Figure 4. Local  $R^2$  in the MGWR model, by date.
